# Supplementary material for: Sequential one-pot three component rhodium-catalysed isomerisation/1,3-dipolar cycloaddition cascades to fused-ring heterocycles
Source: Royal Society of Chemistry journal article supplement (doi:10.1039/c3ra45906c), 2013-11-05

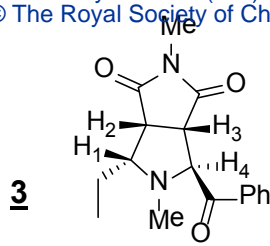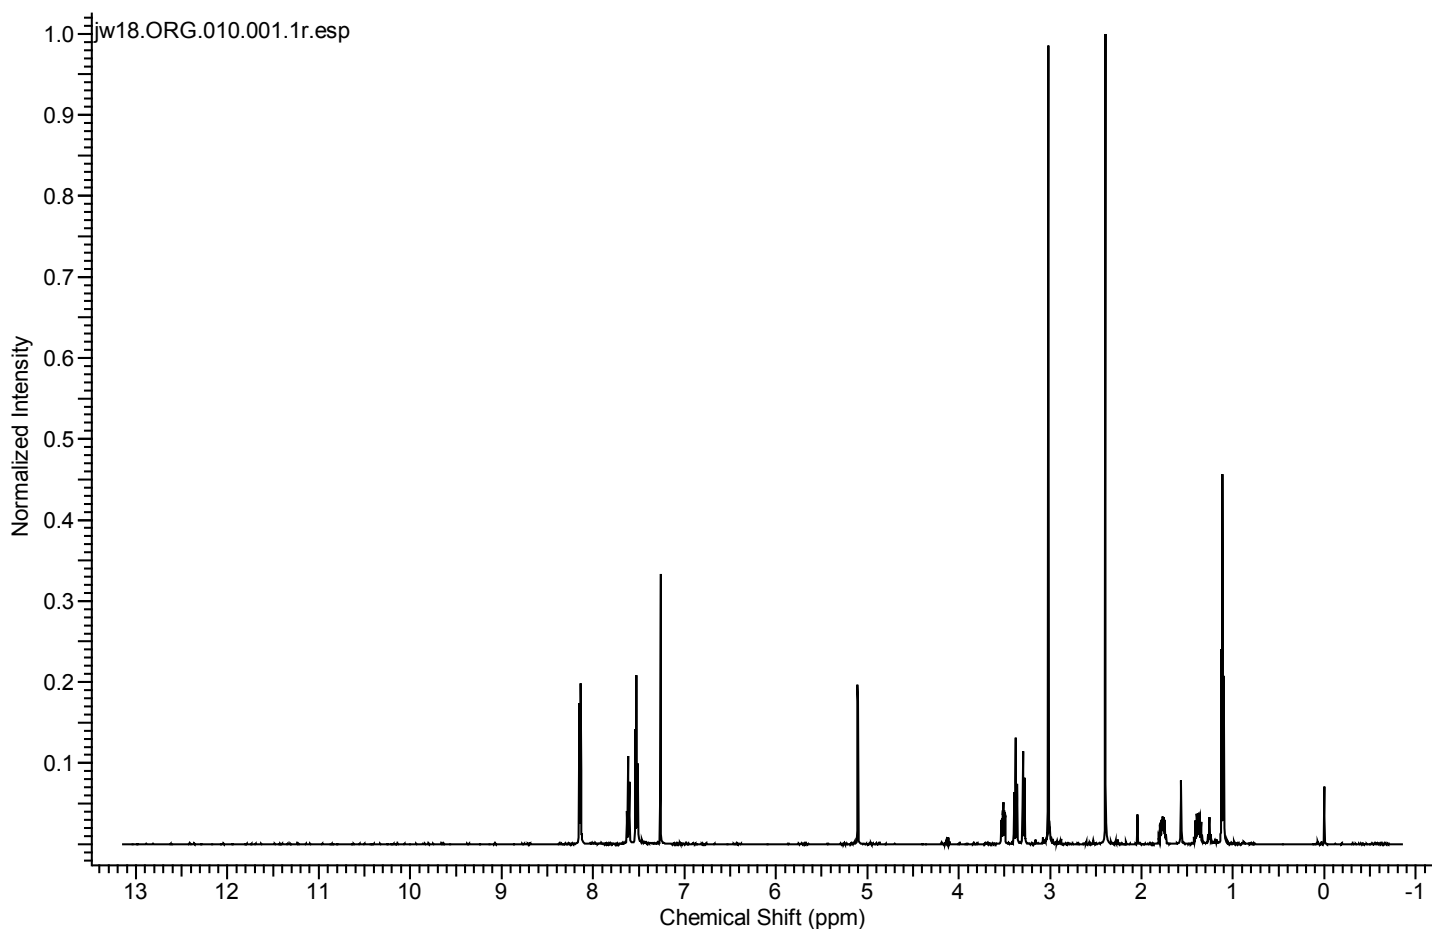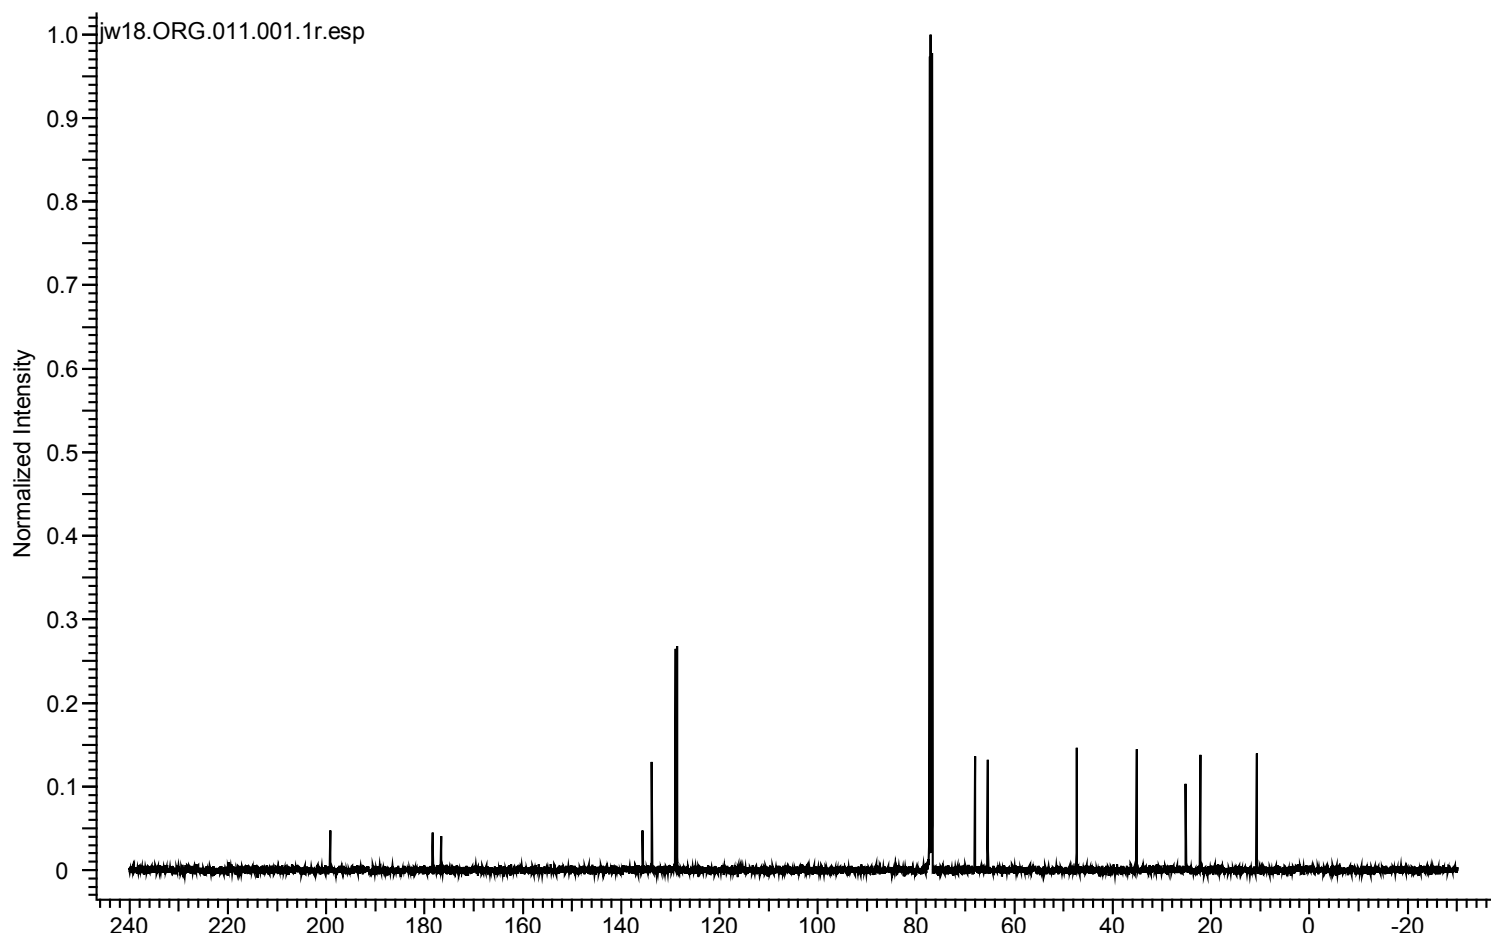

**4**

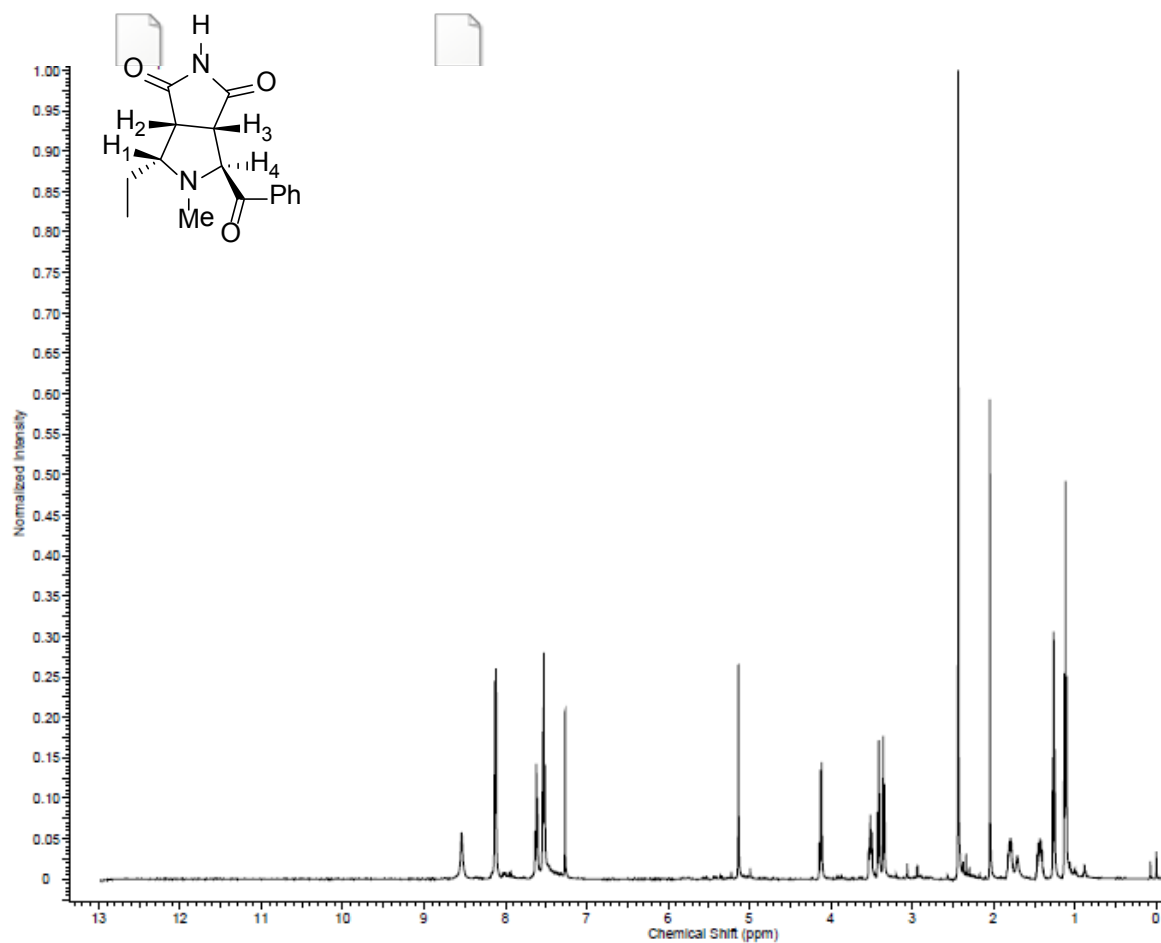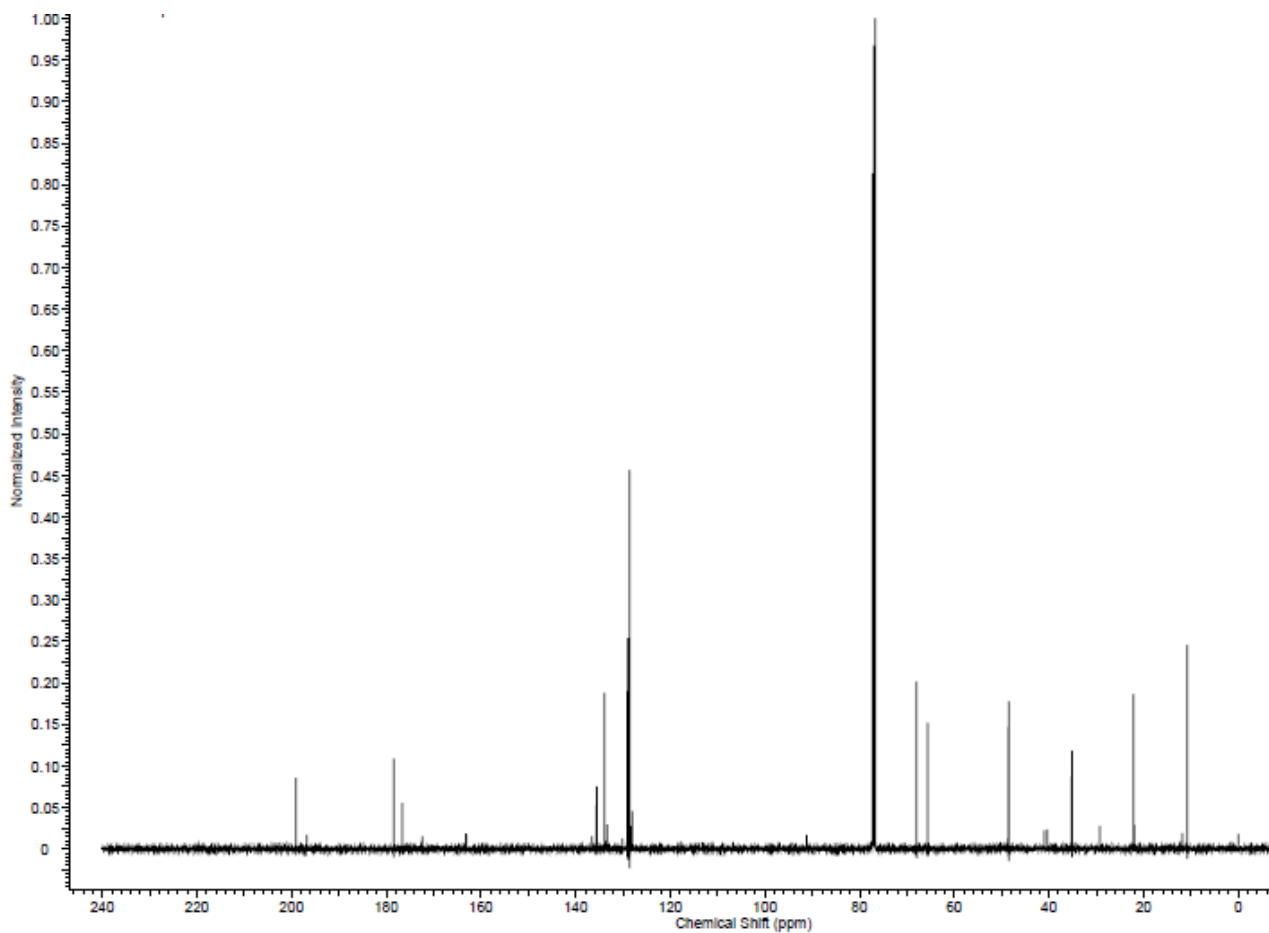

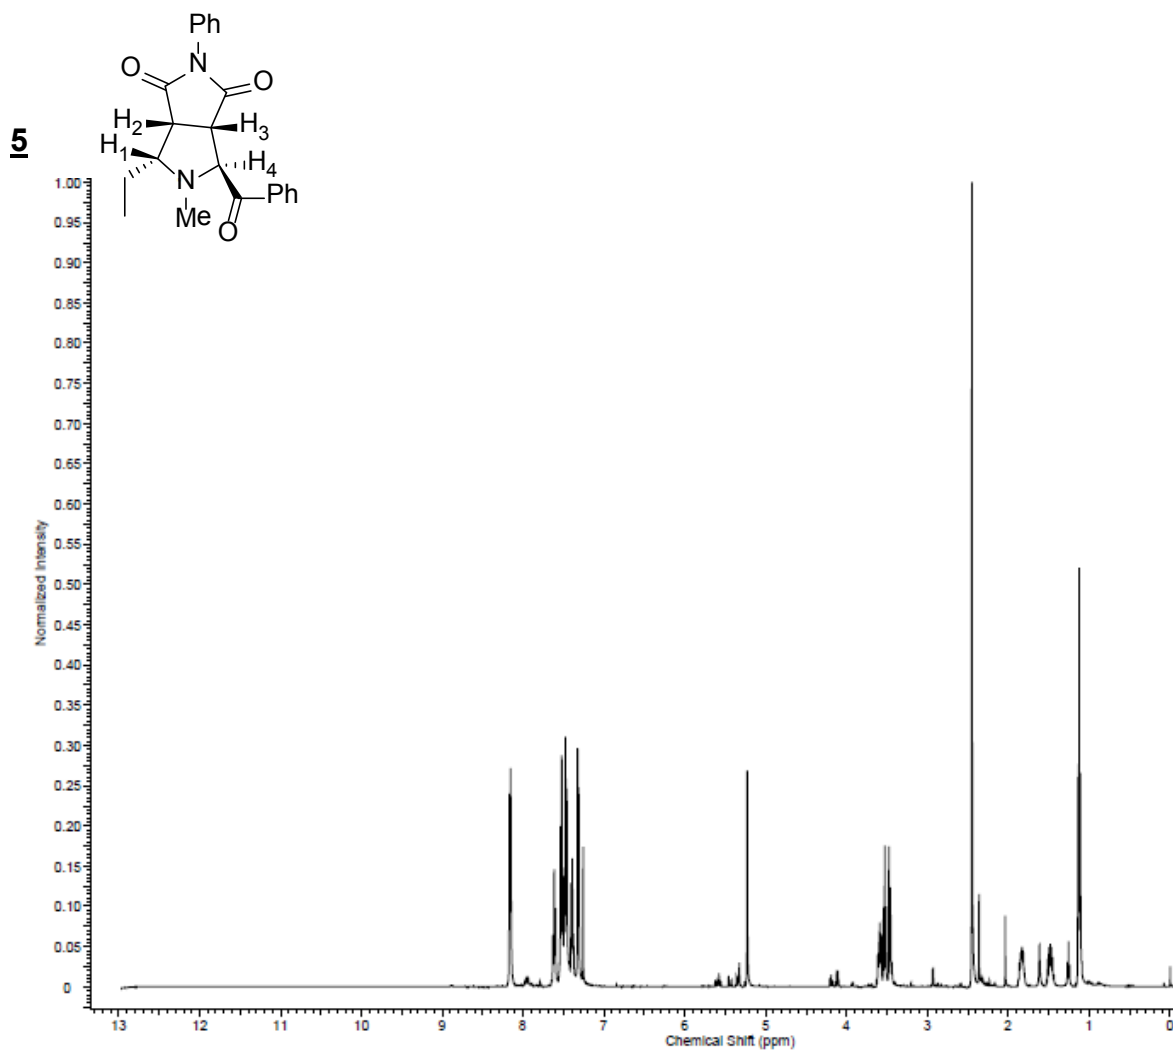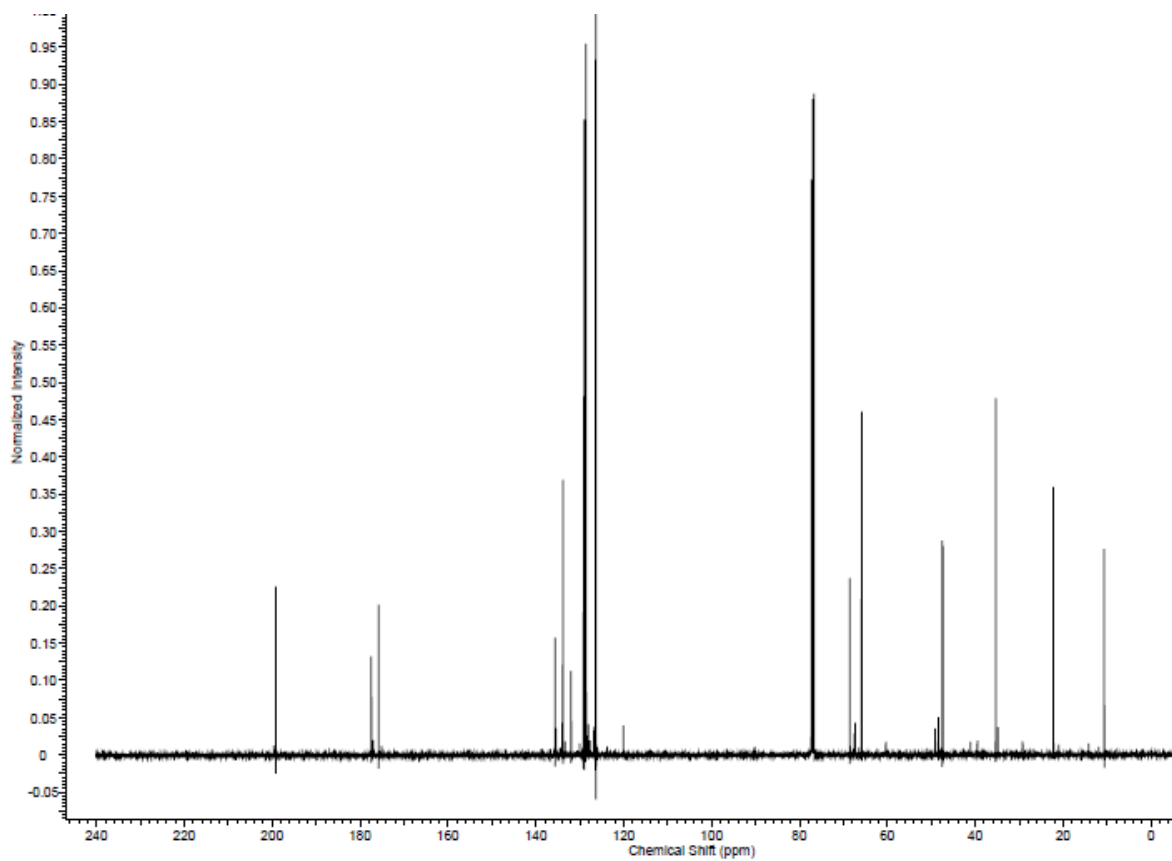

6

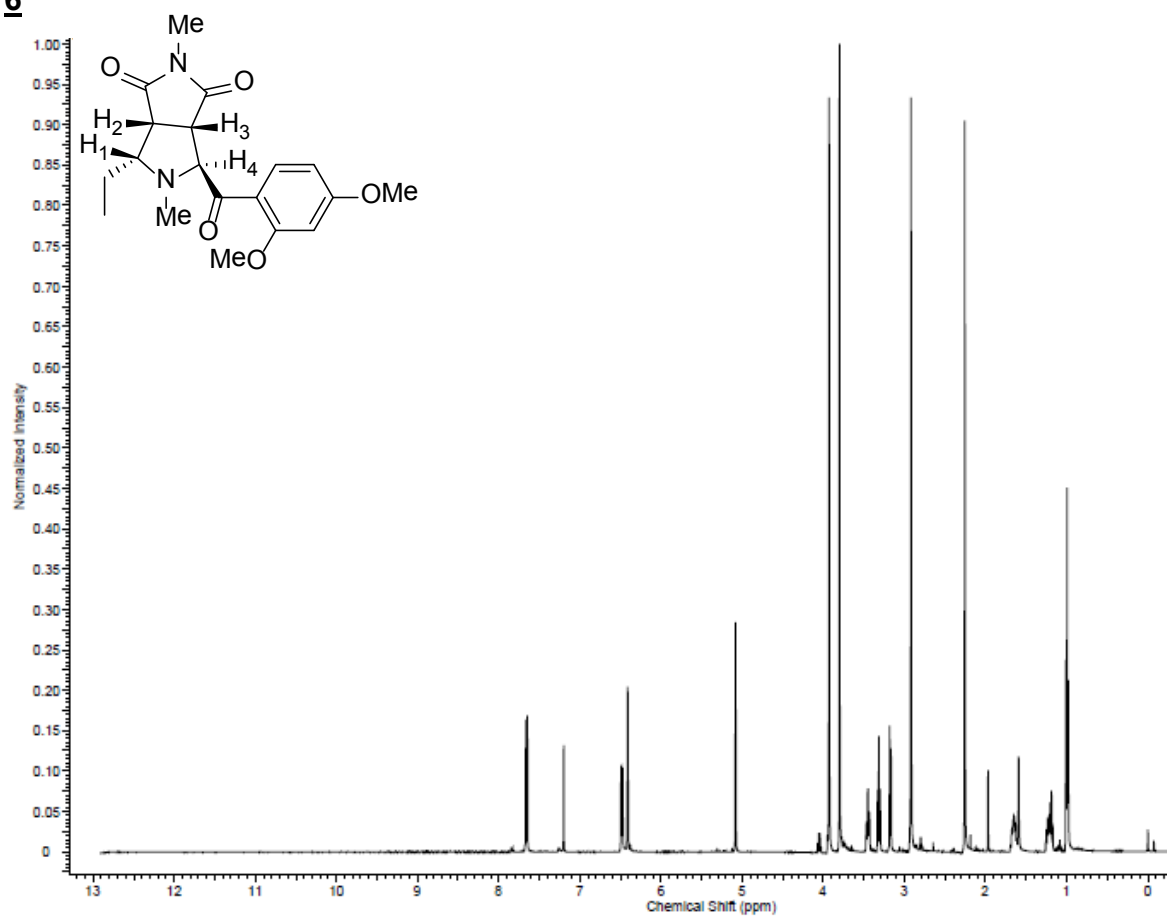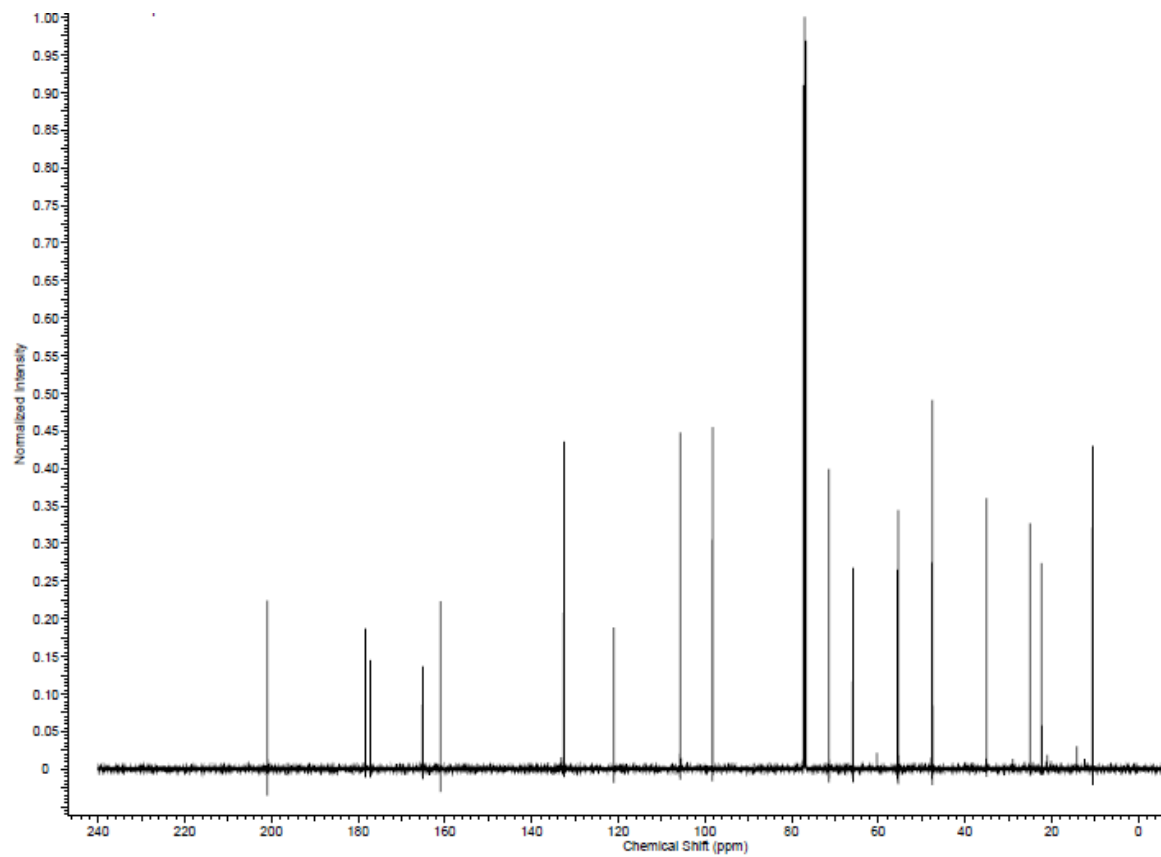

**7**

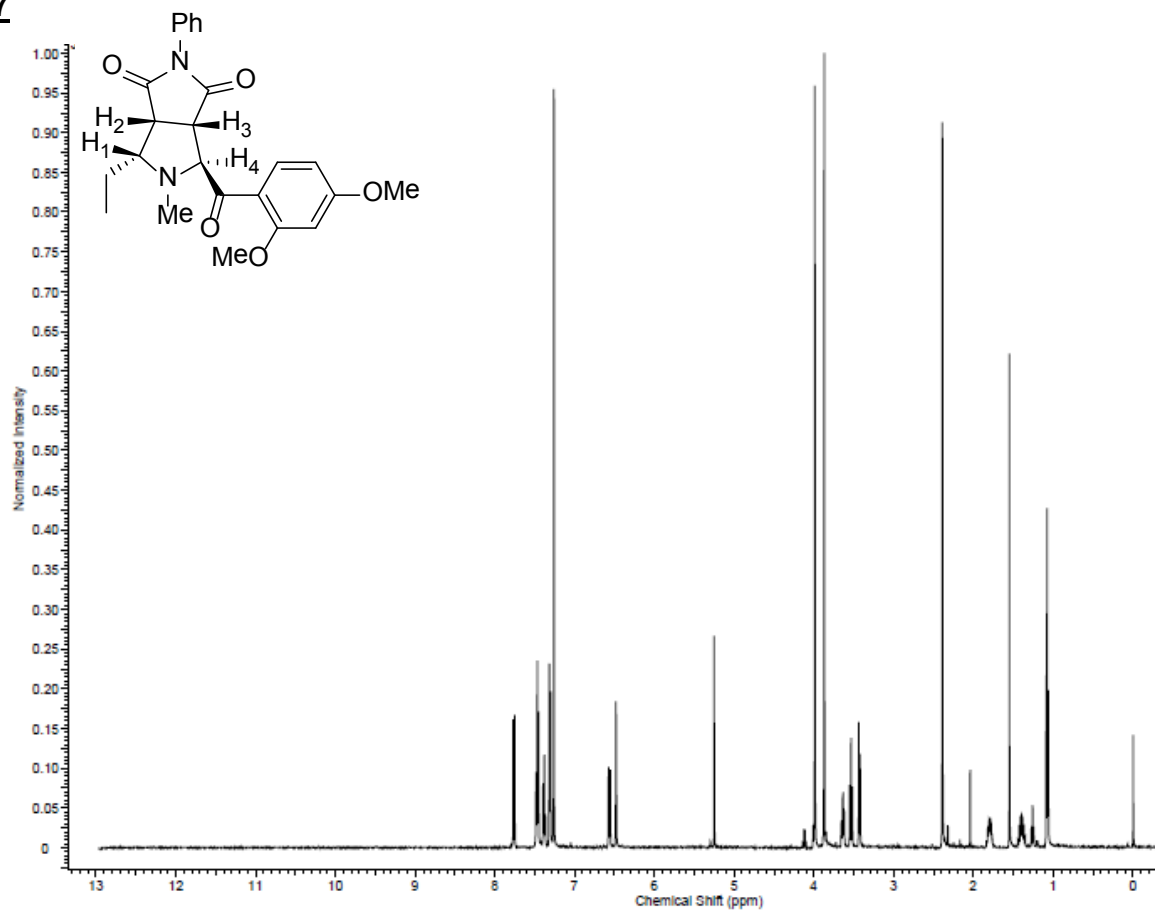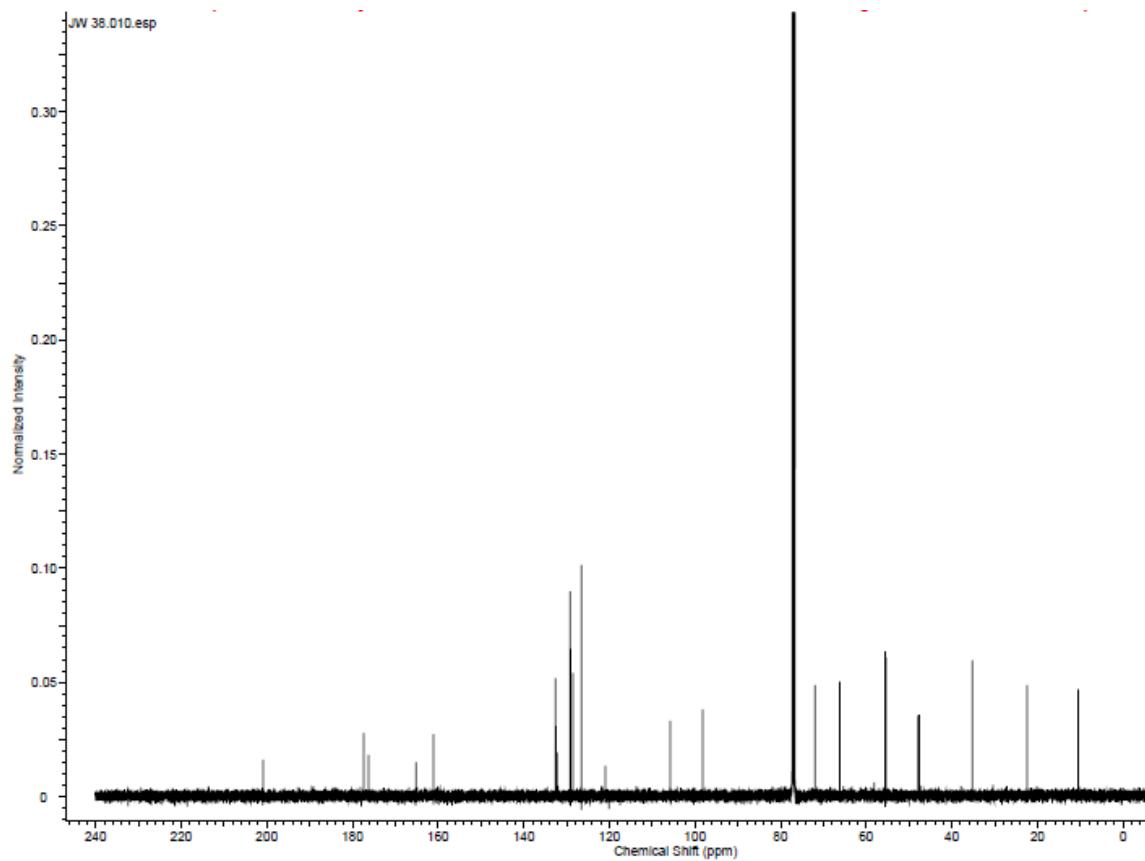

18

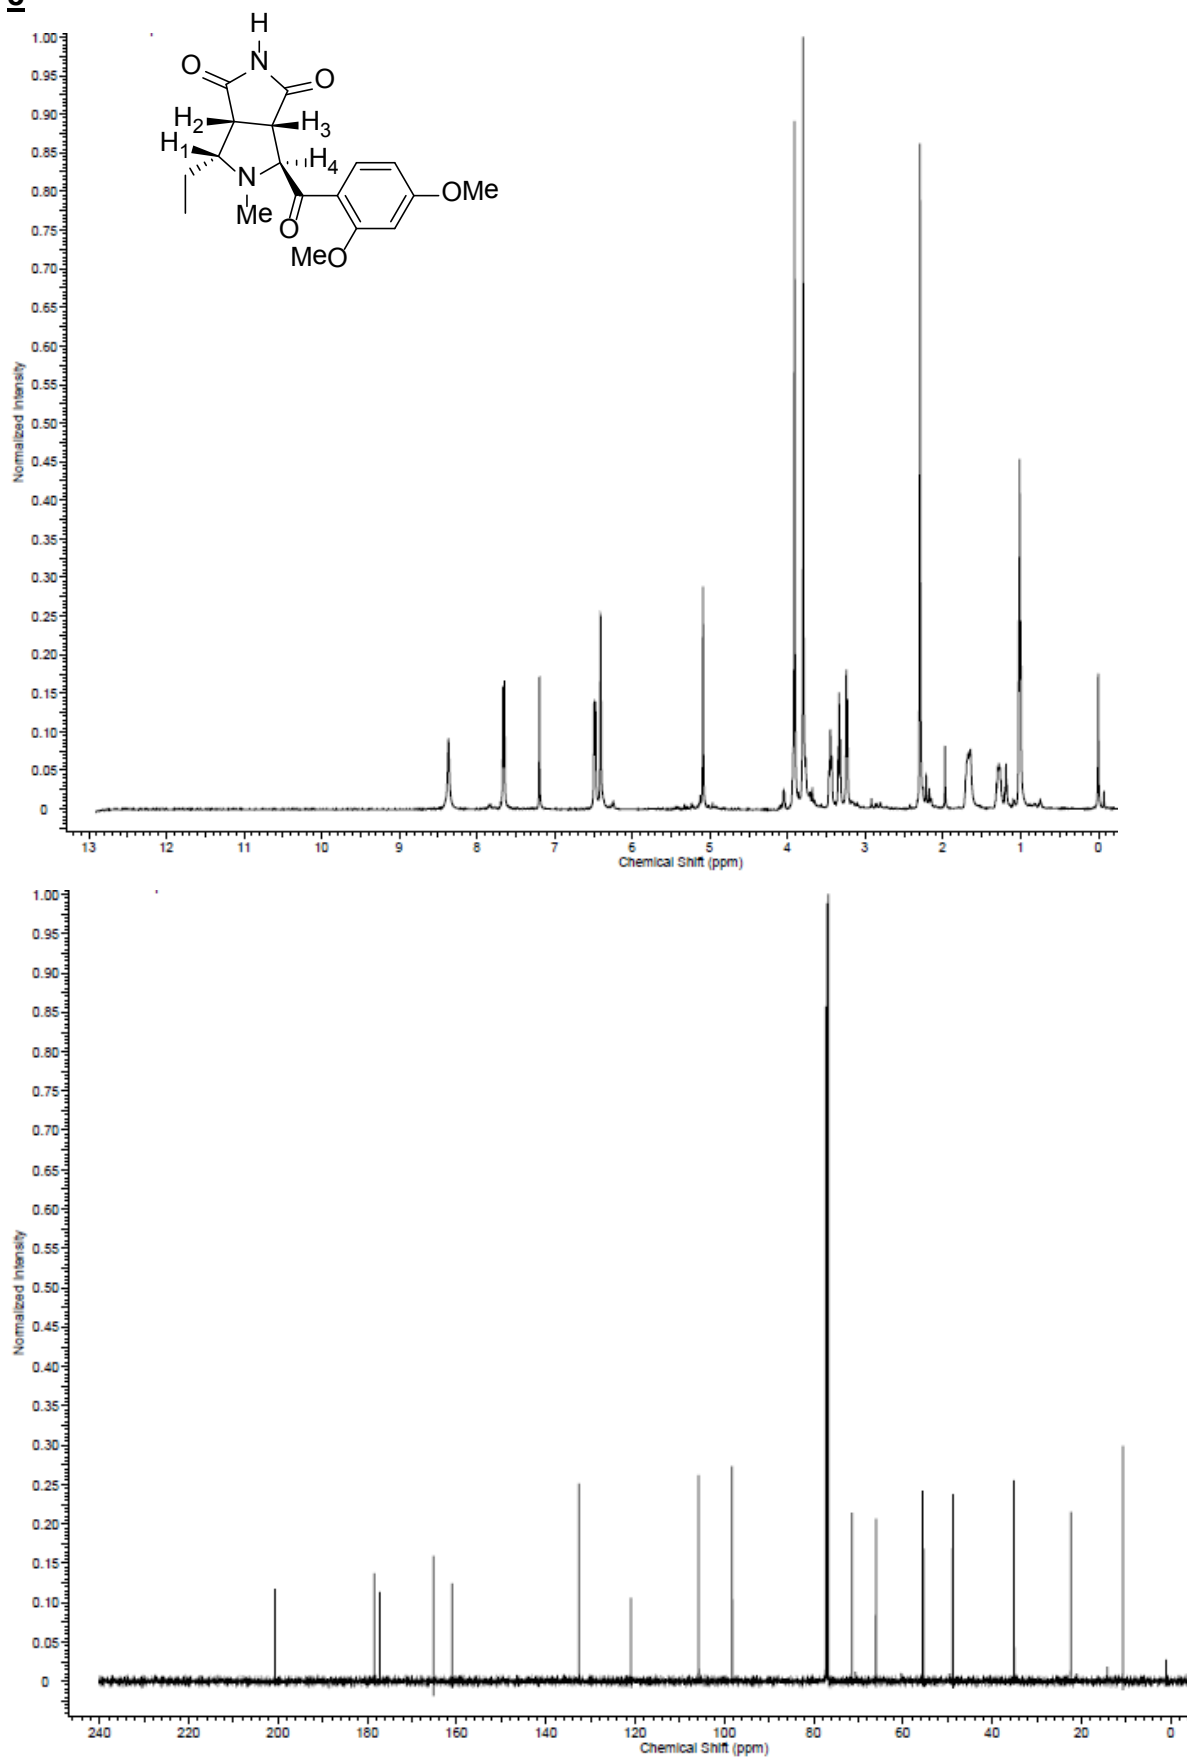

**9**

H nmr.010.esp

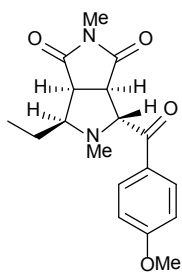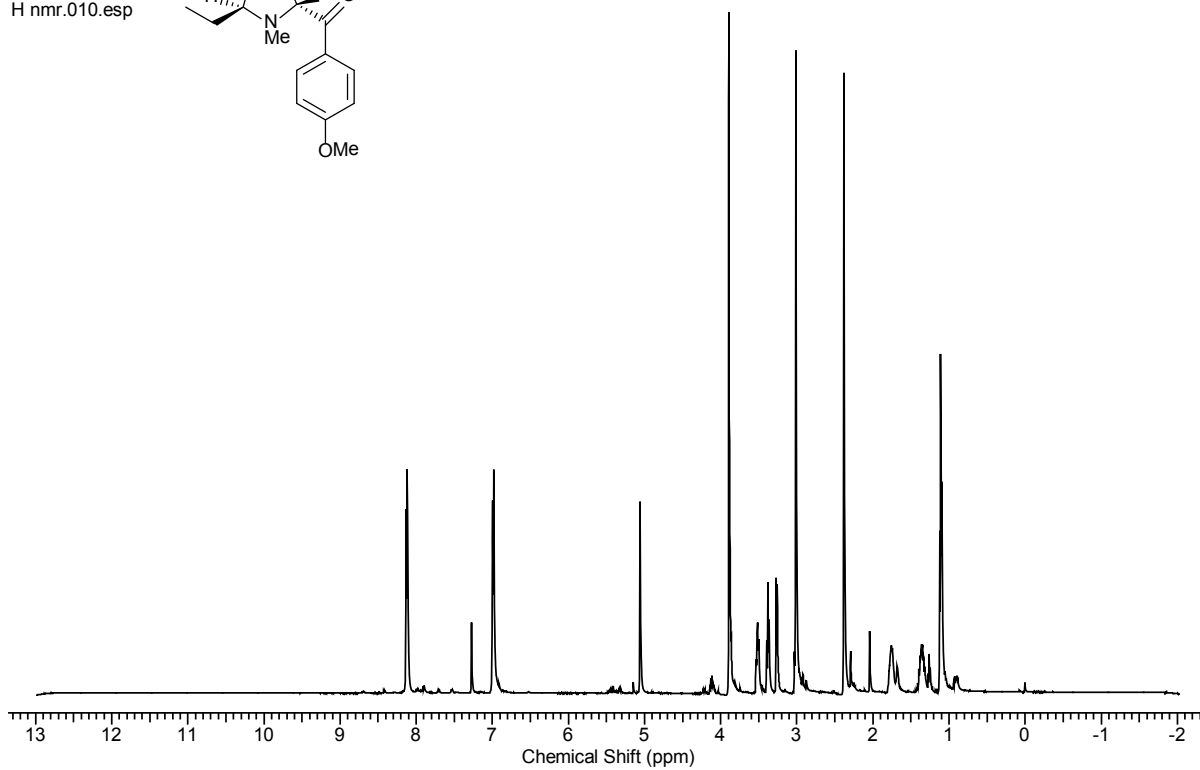

c nmr.010.esp

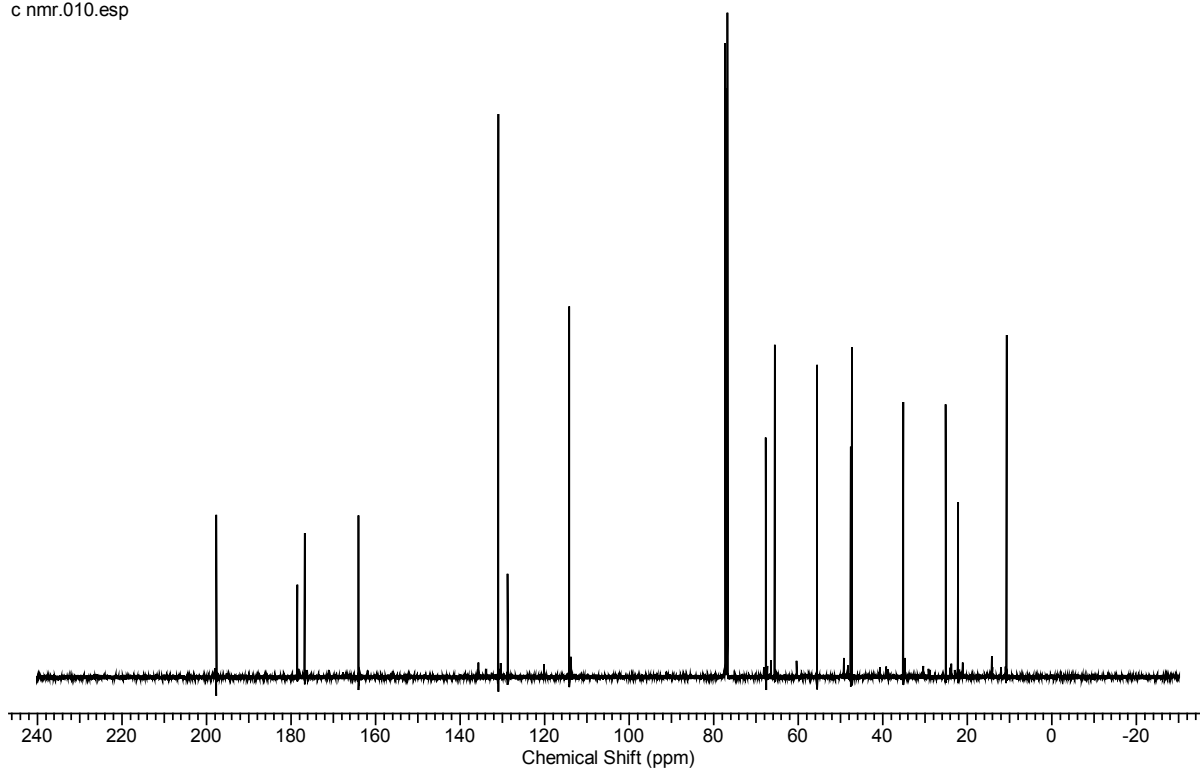

# 10

HNMR.010.esp

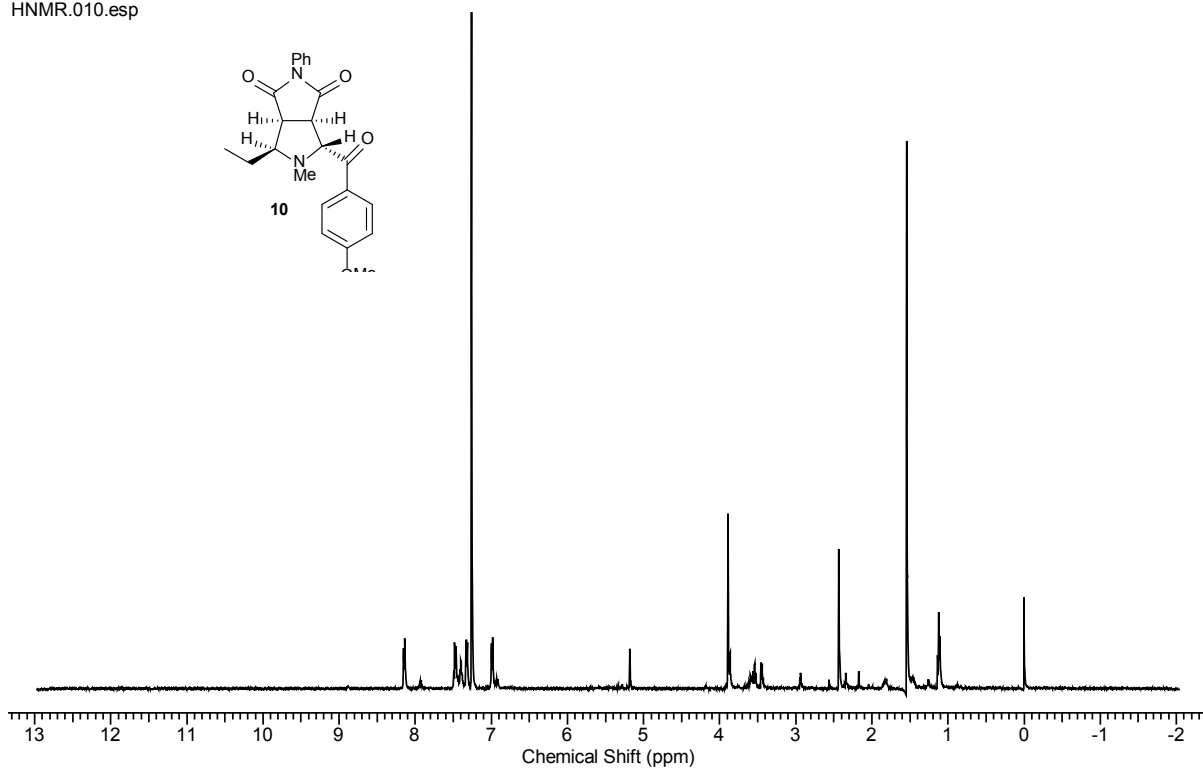

c nmr.010.esp

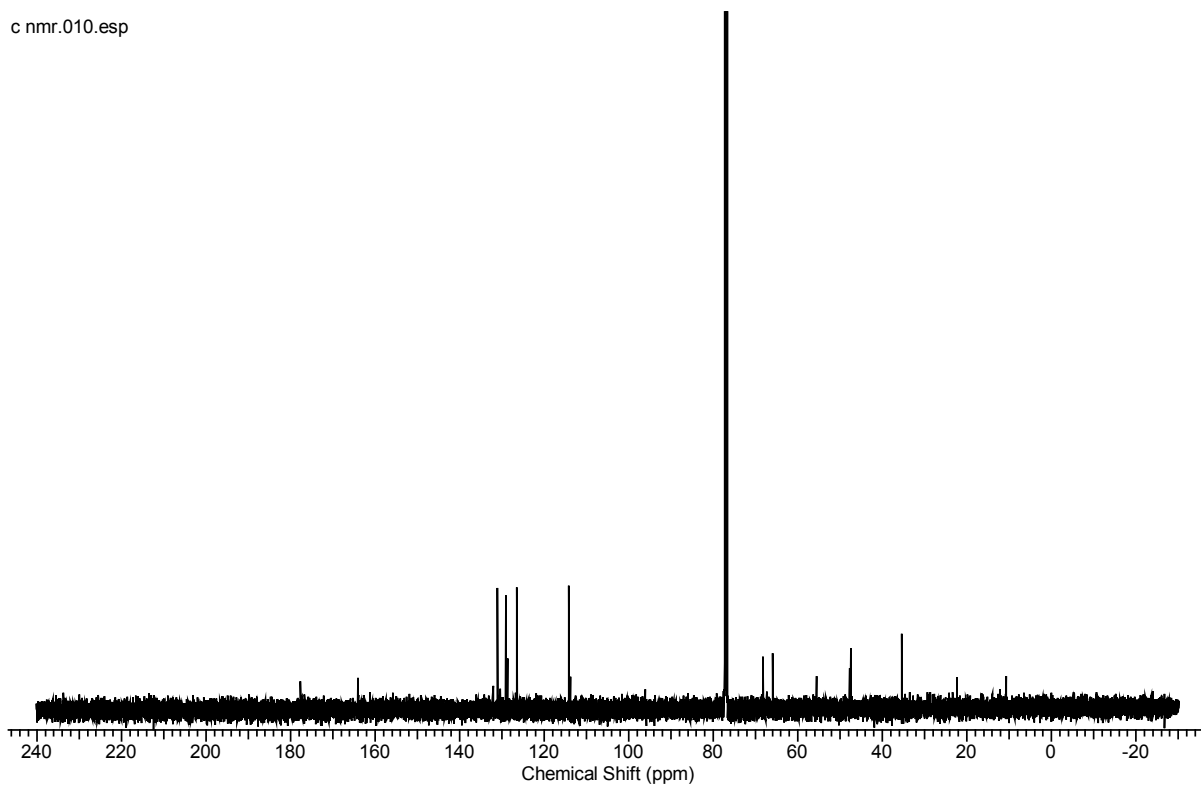



## 11 major

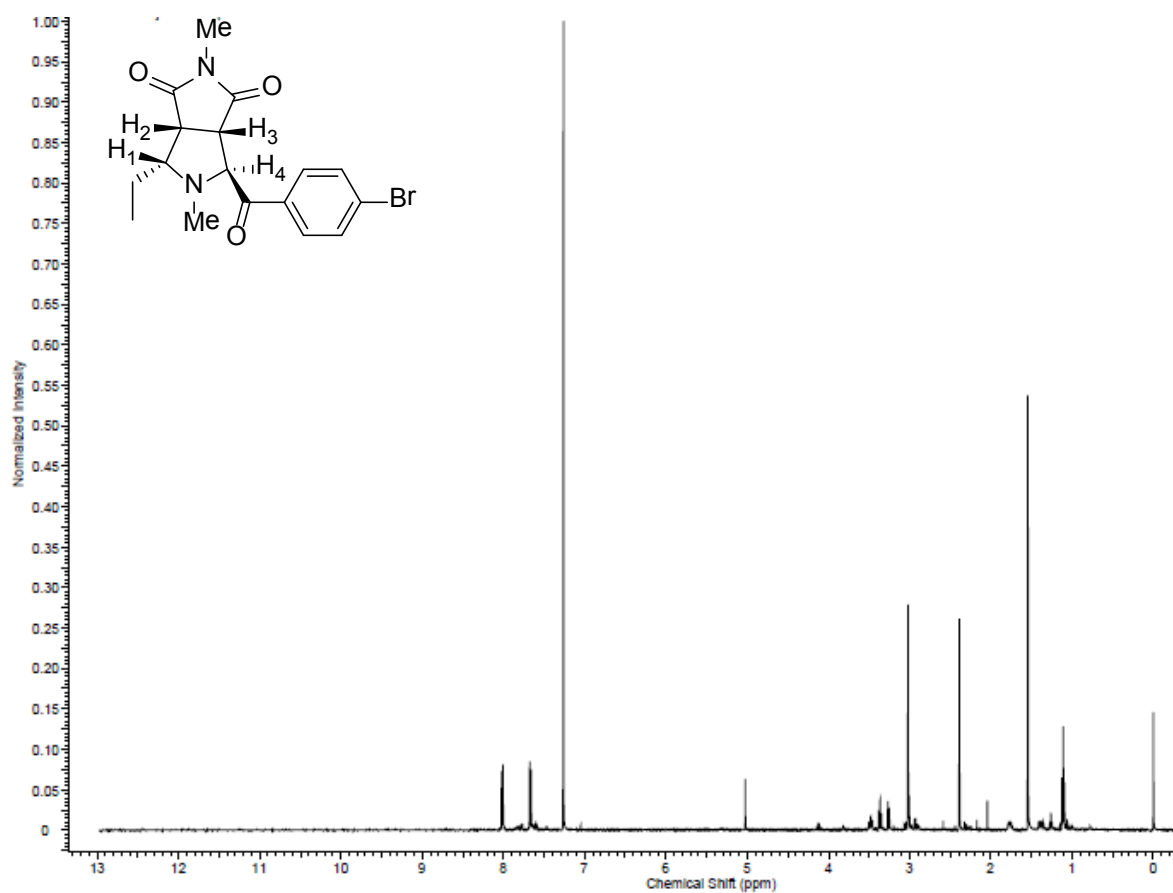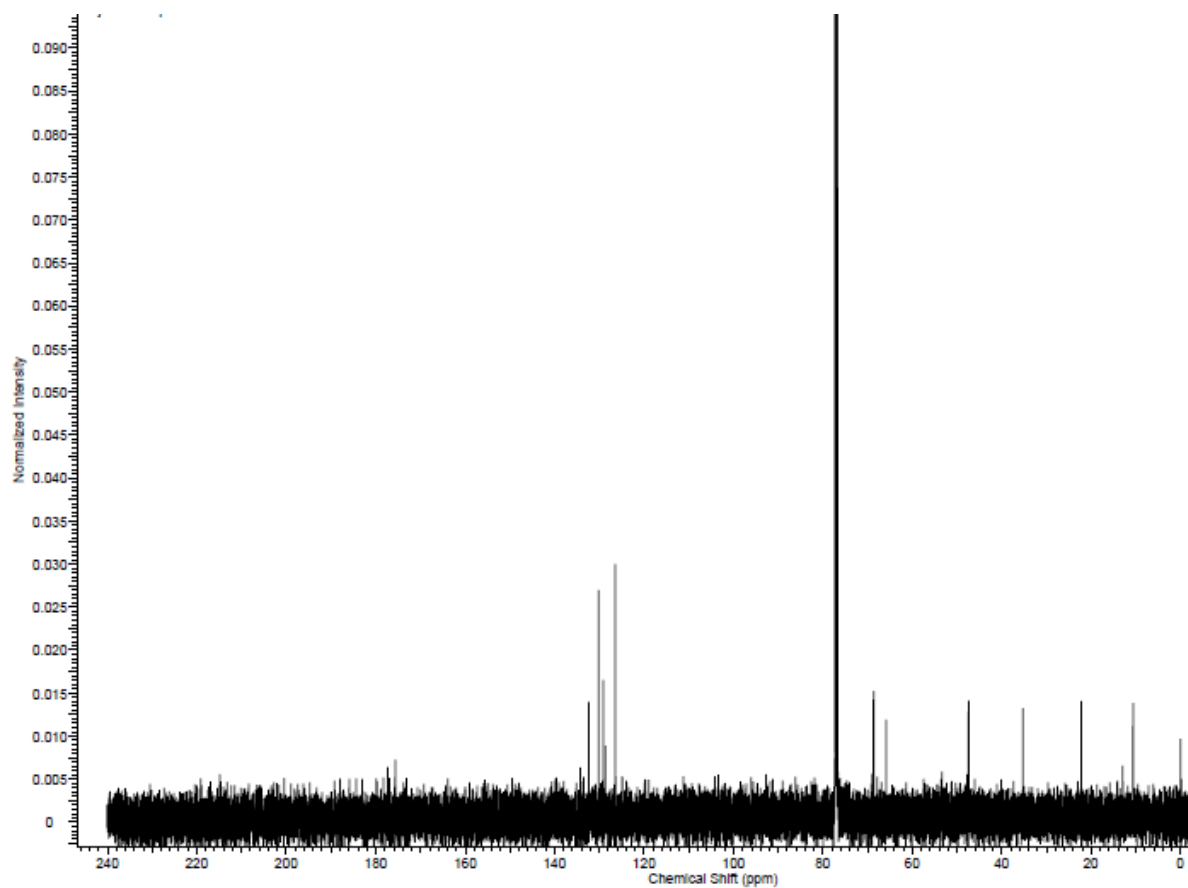

## 12 minor

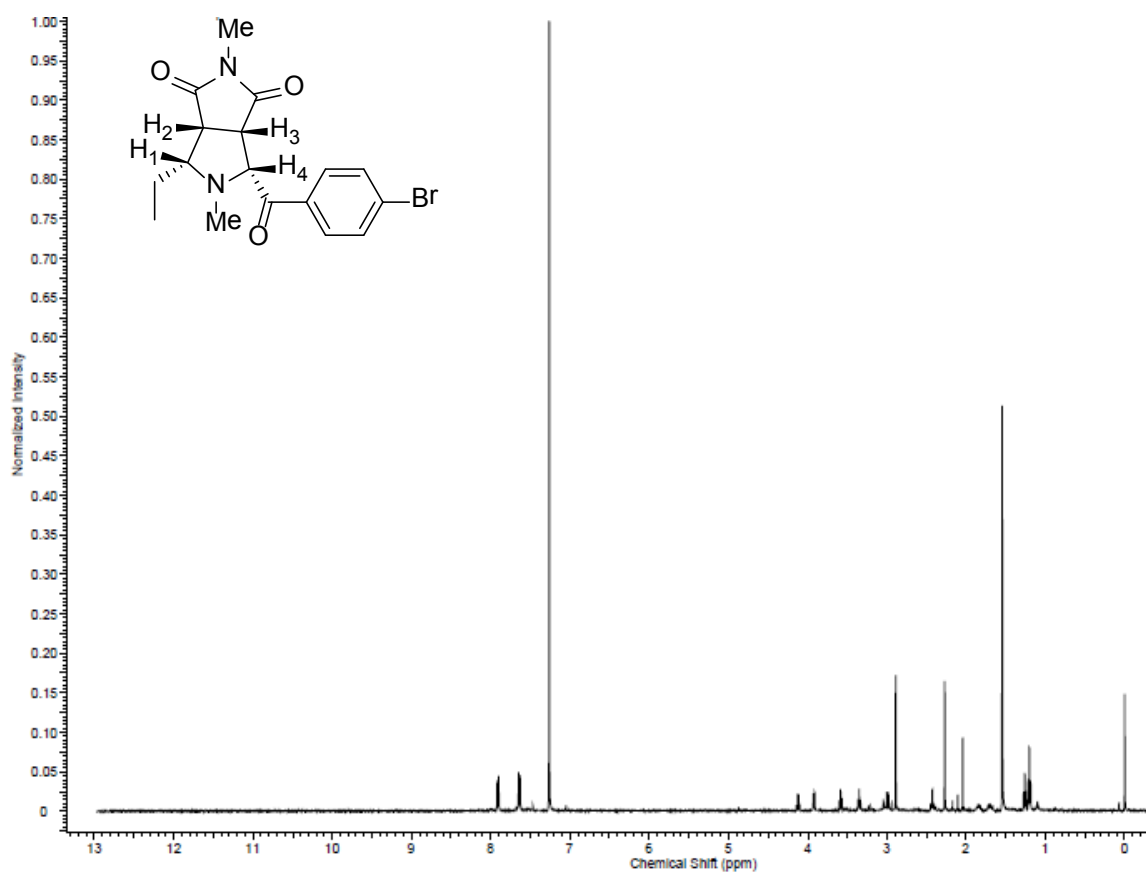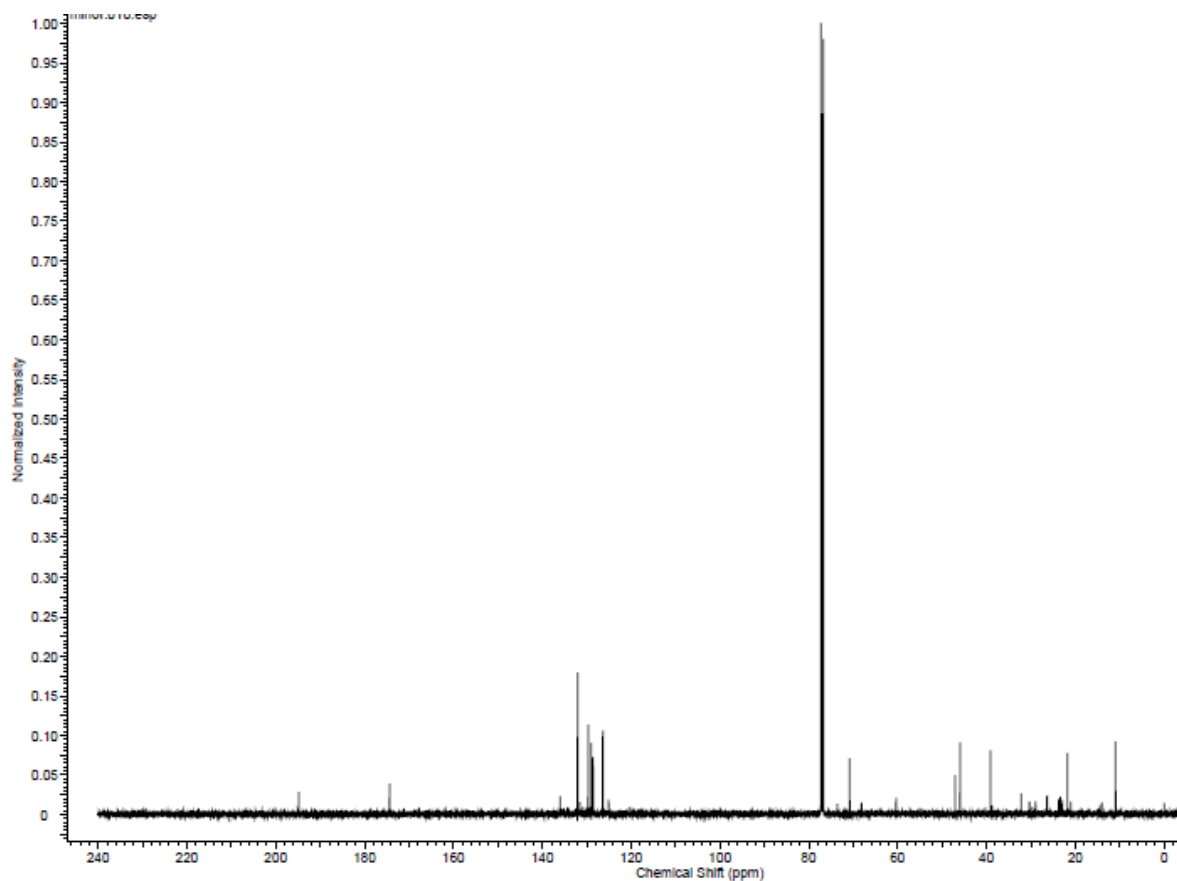

### 13 major

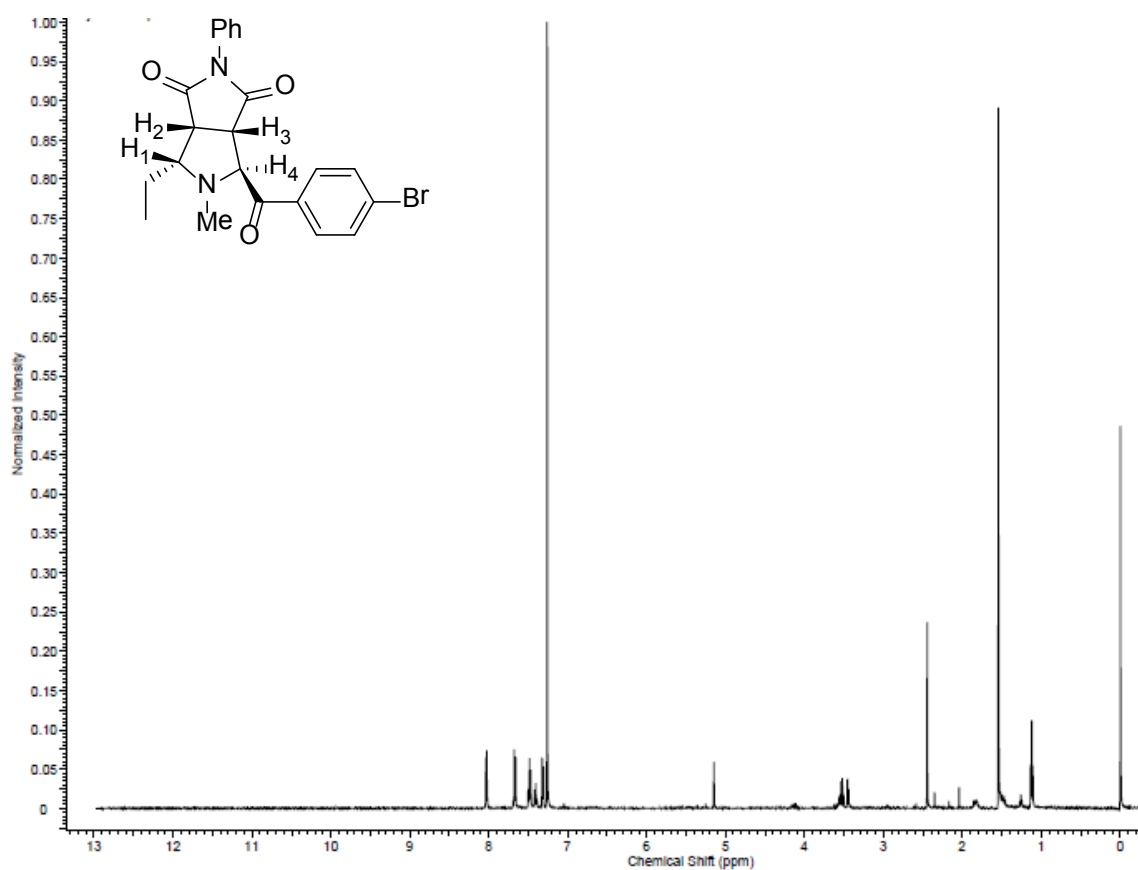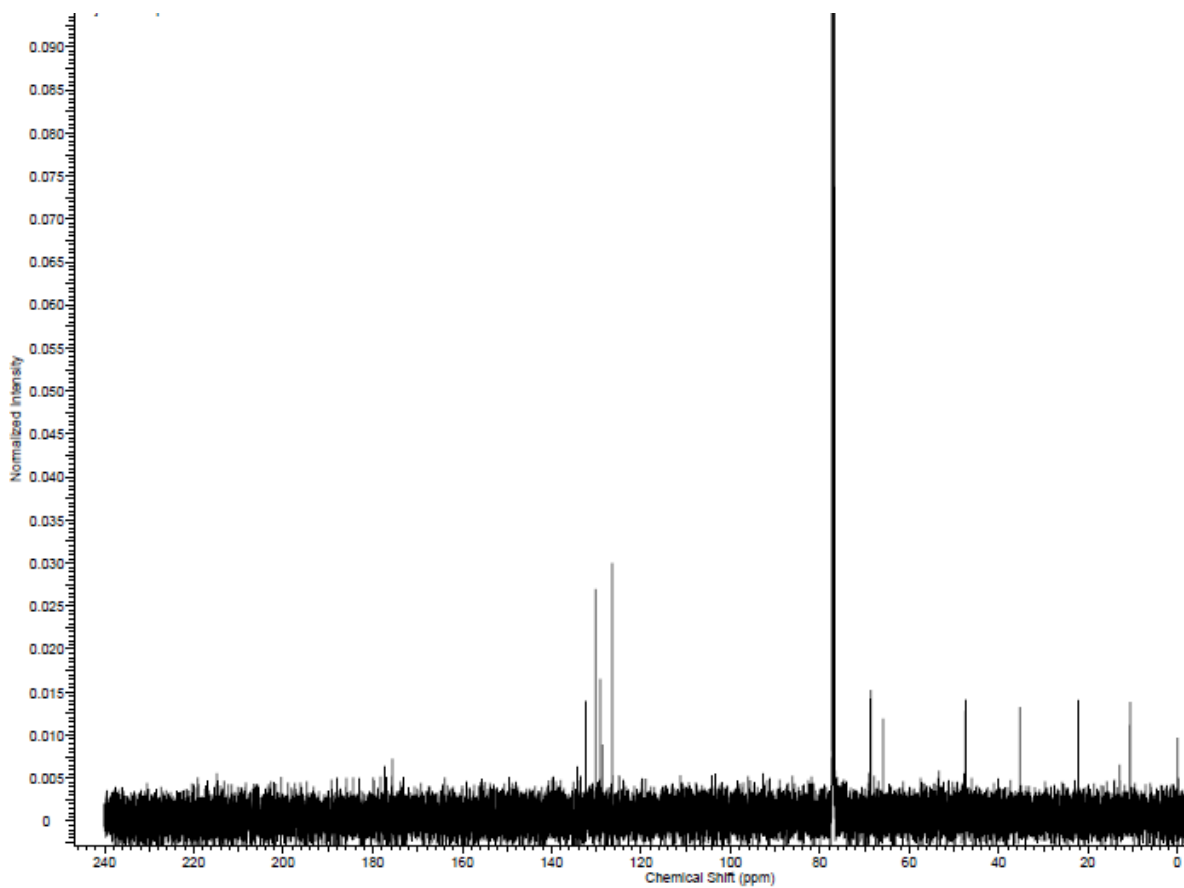

## 14 minor

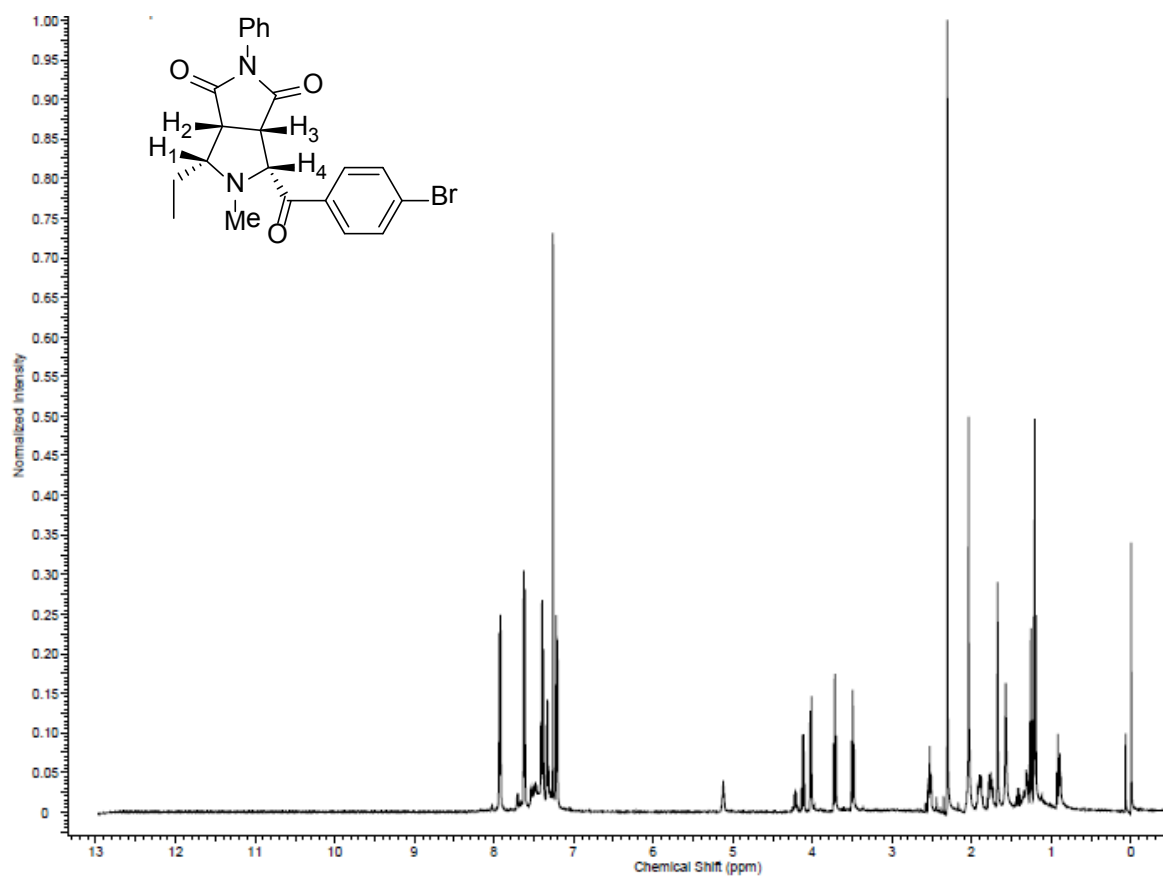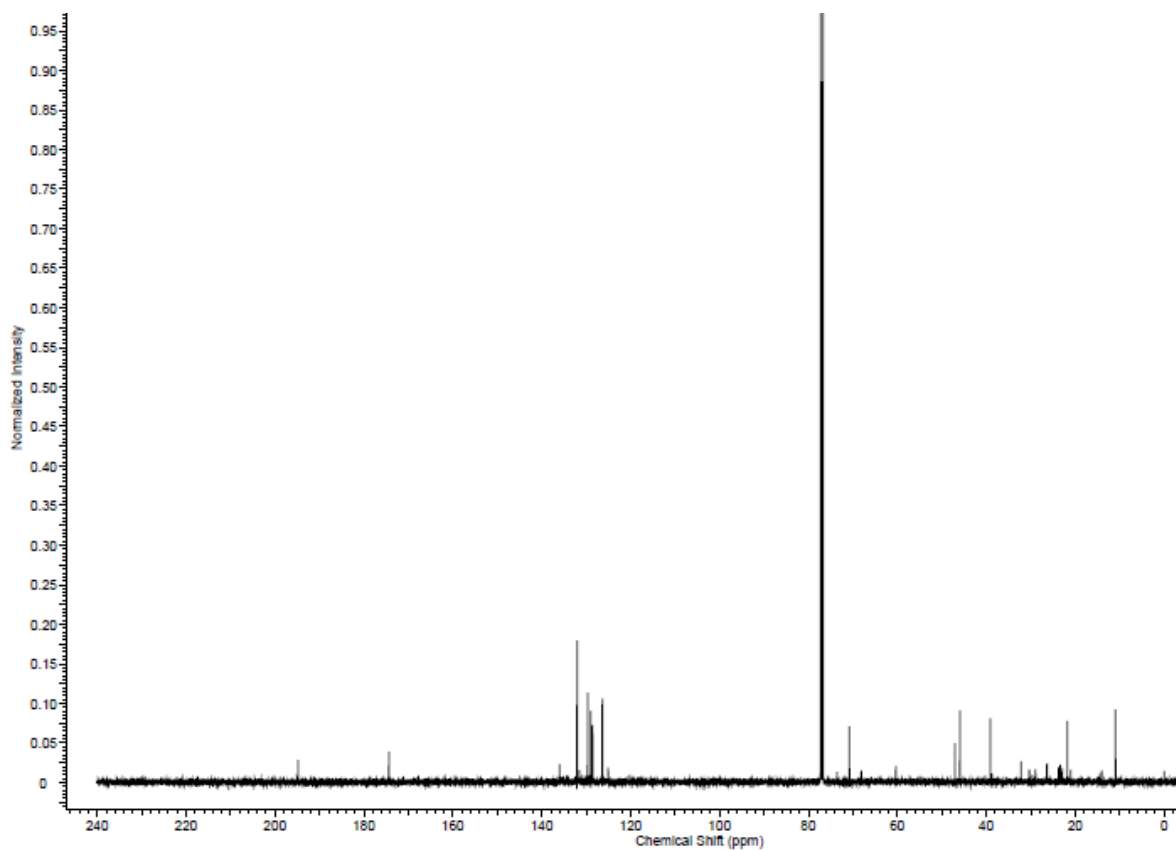

# 15

H nmr.010.esp

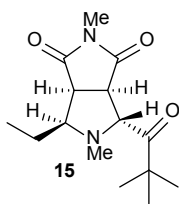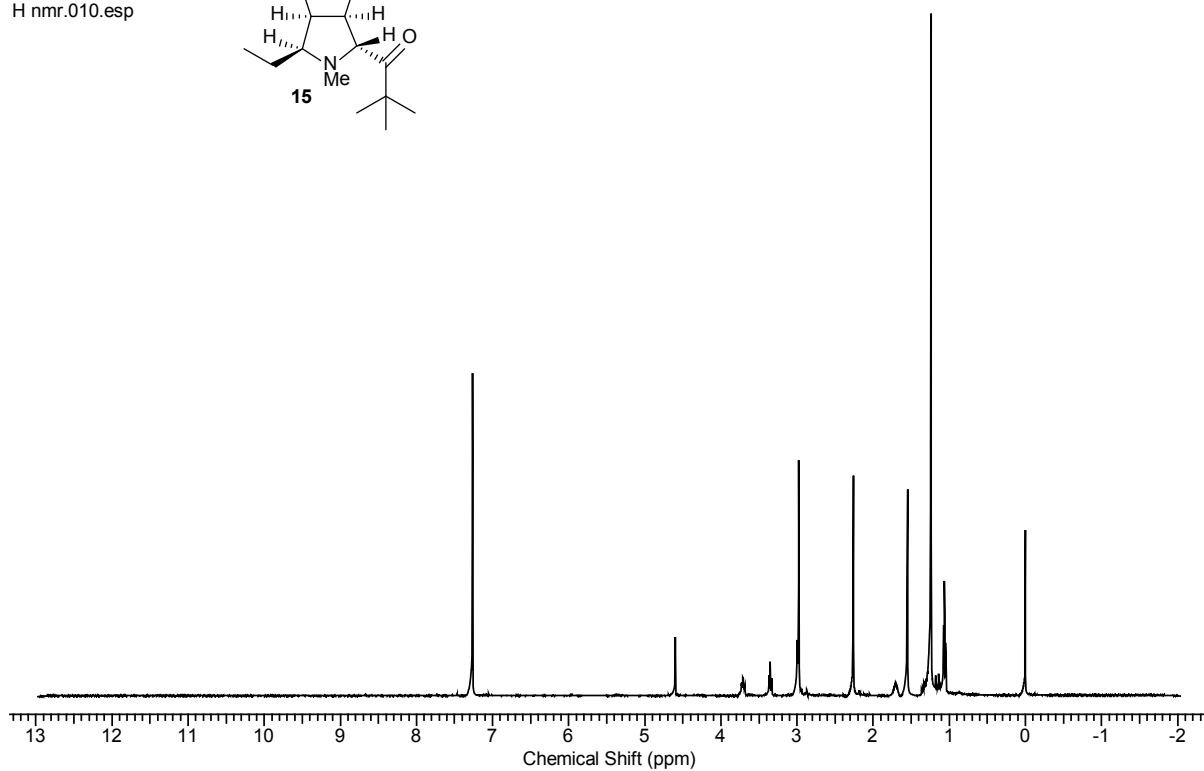

C nmr.010.esp

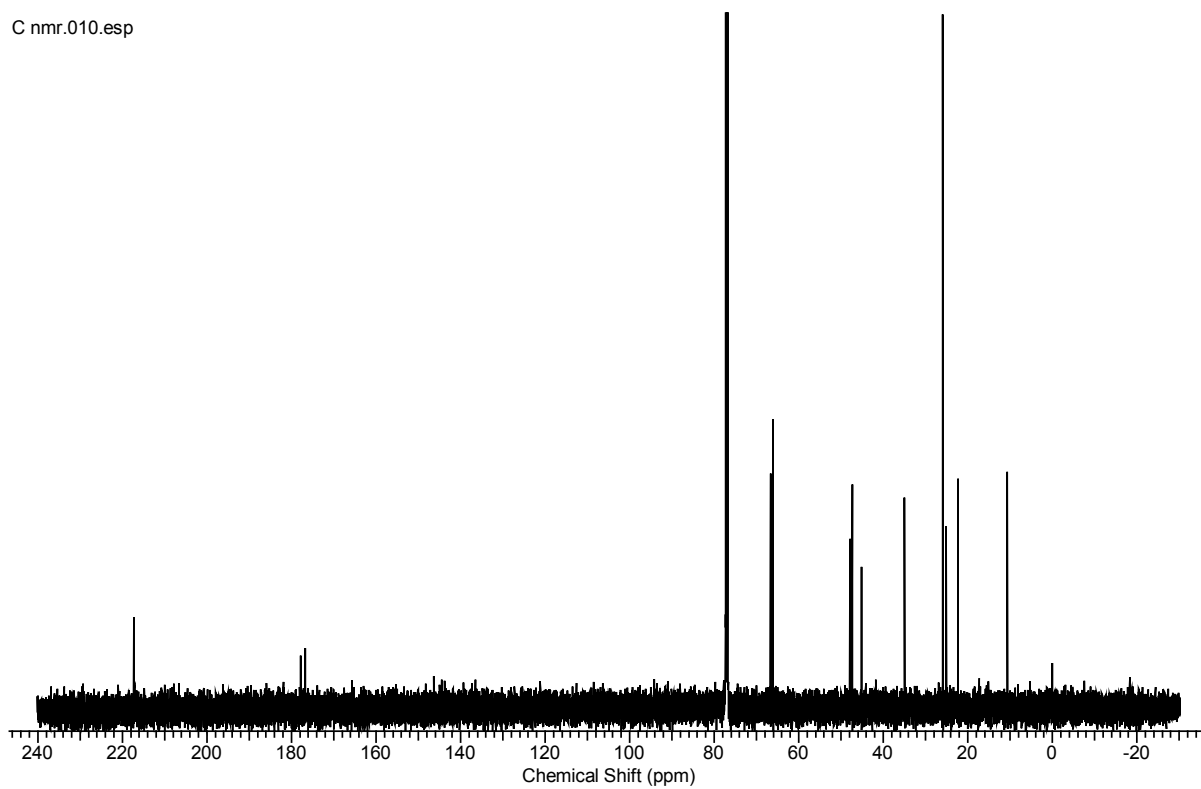

**16**

H nmr.010.esp

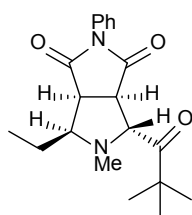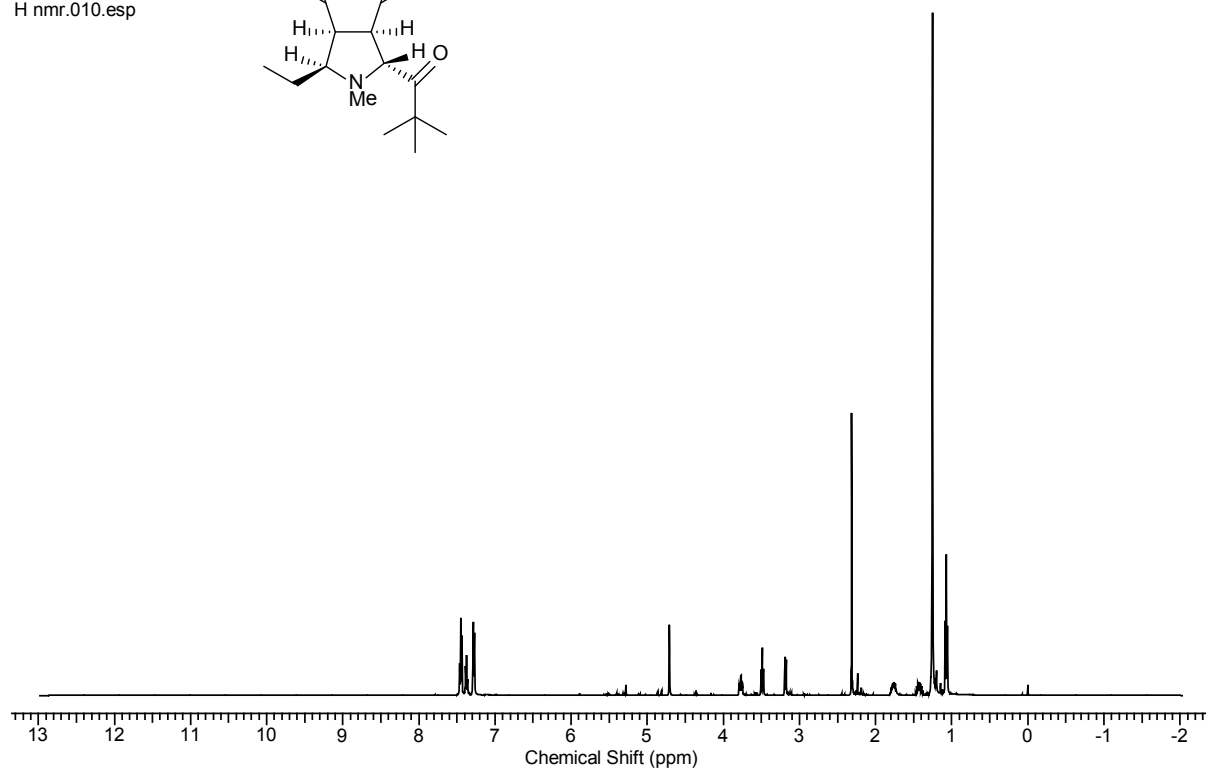

C nmr.010.esp

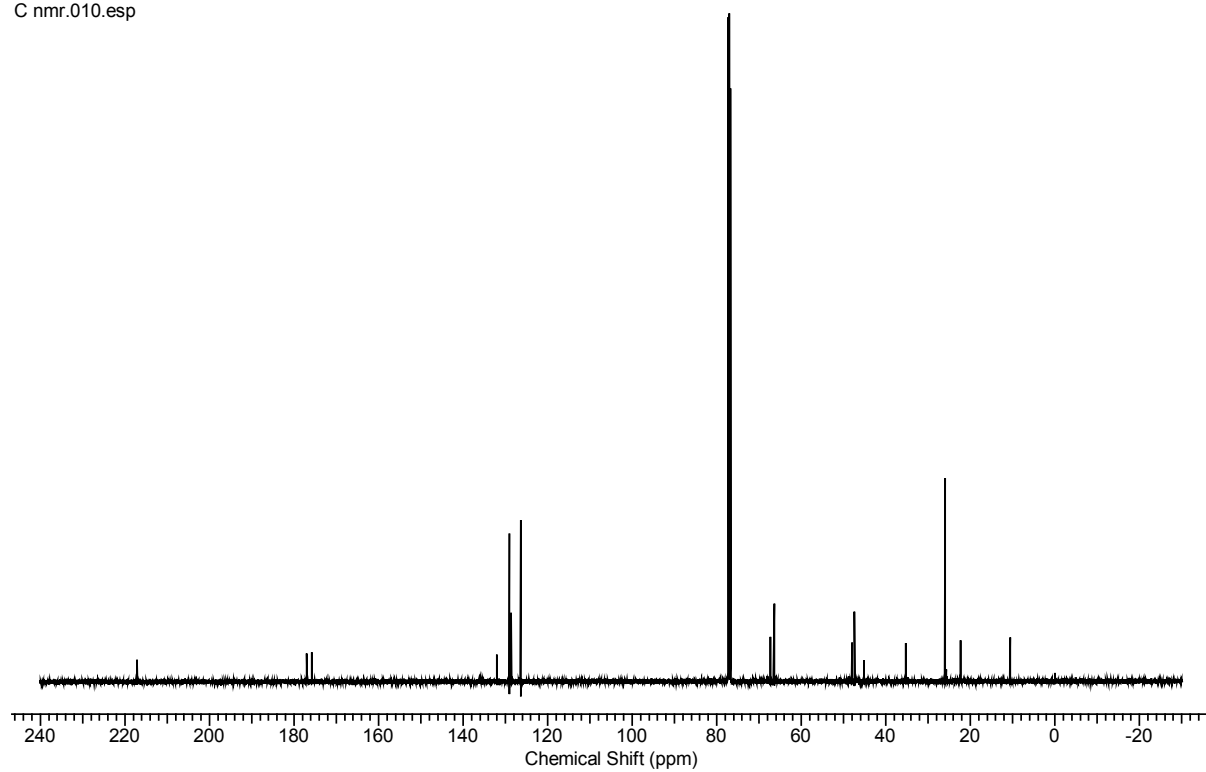

**17**

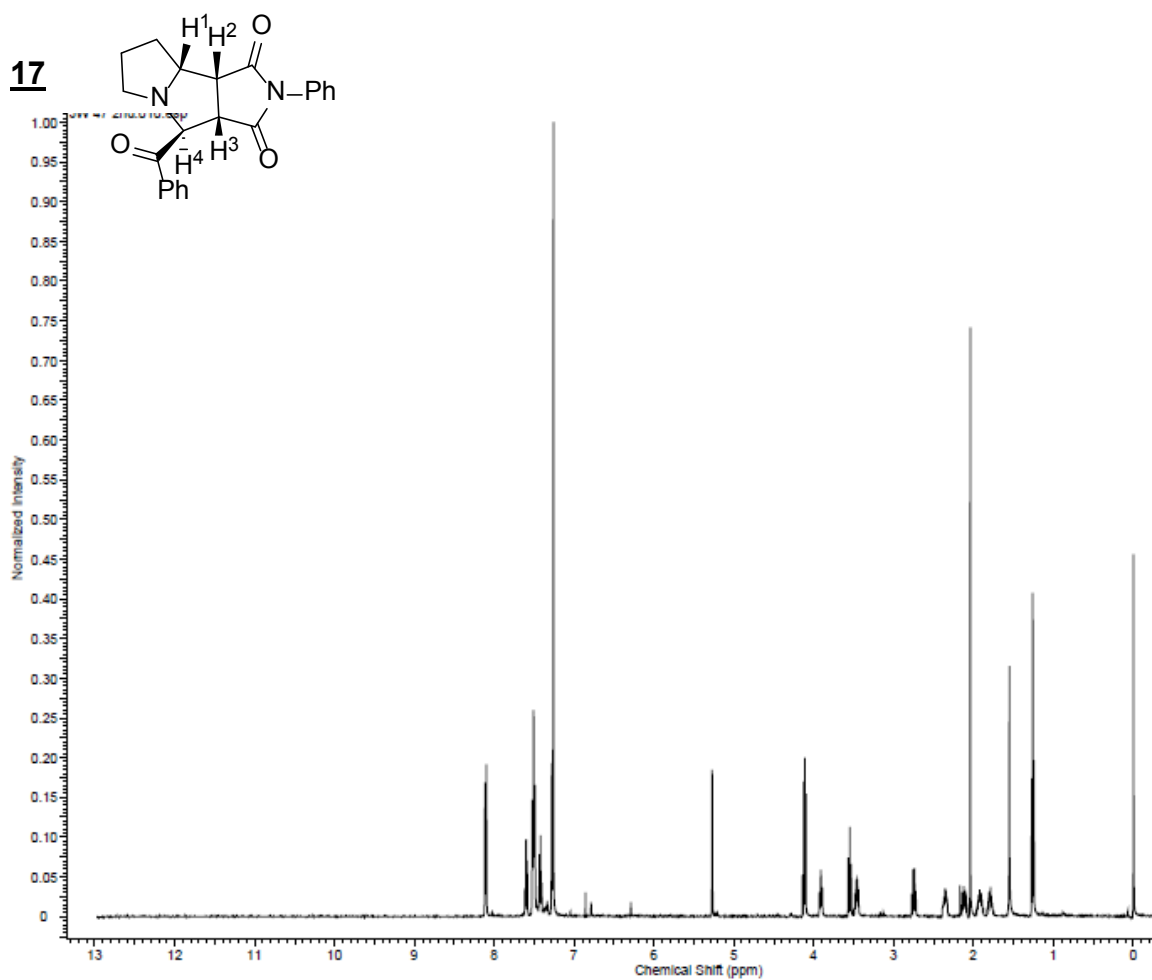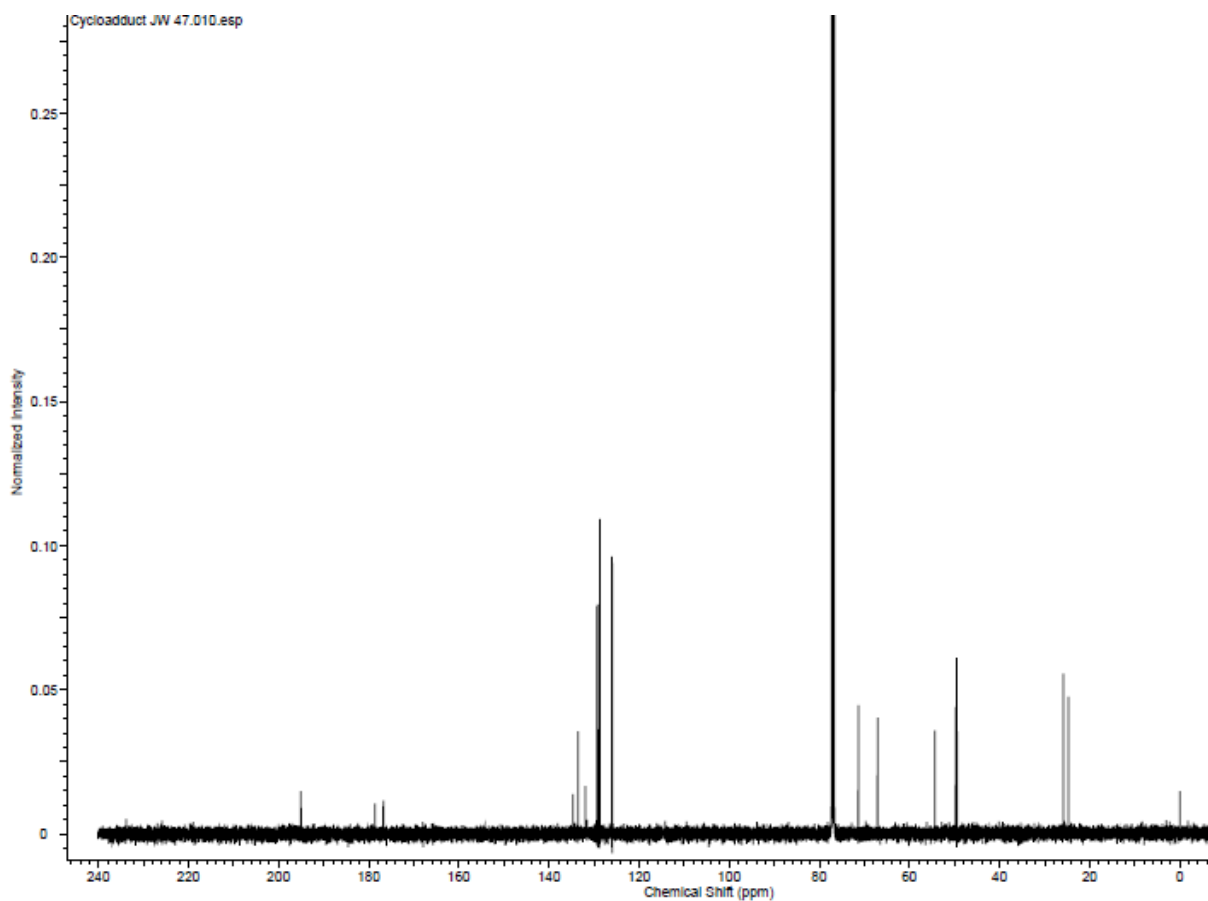

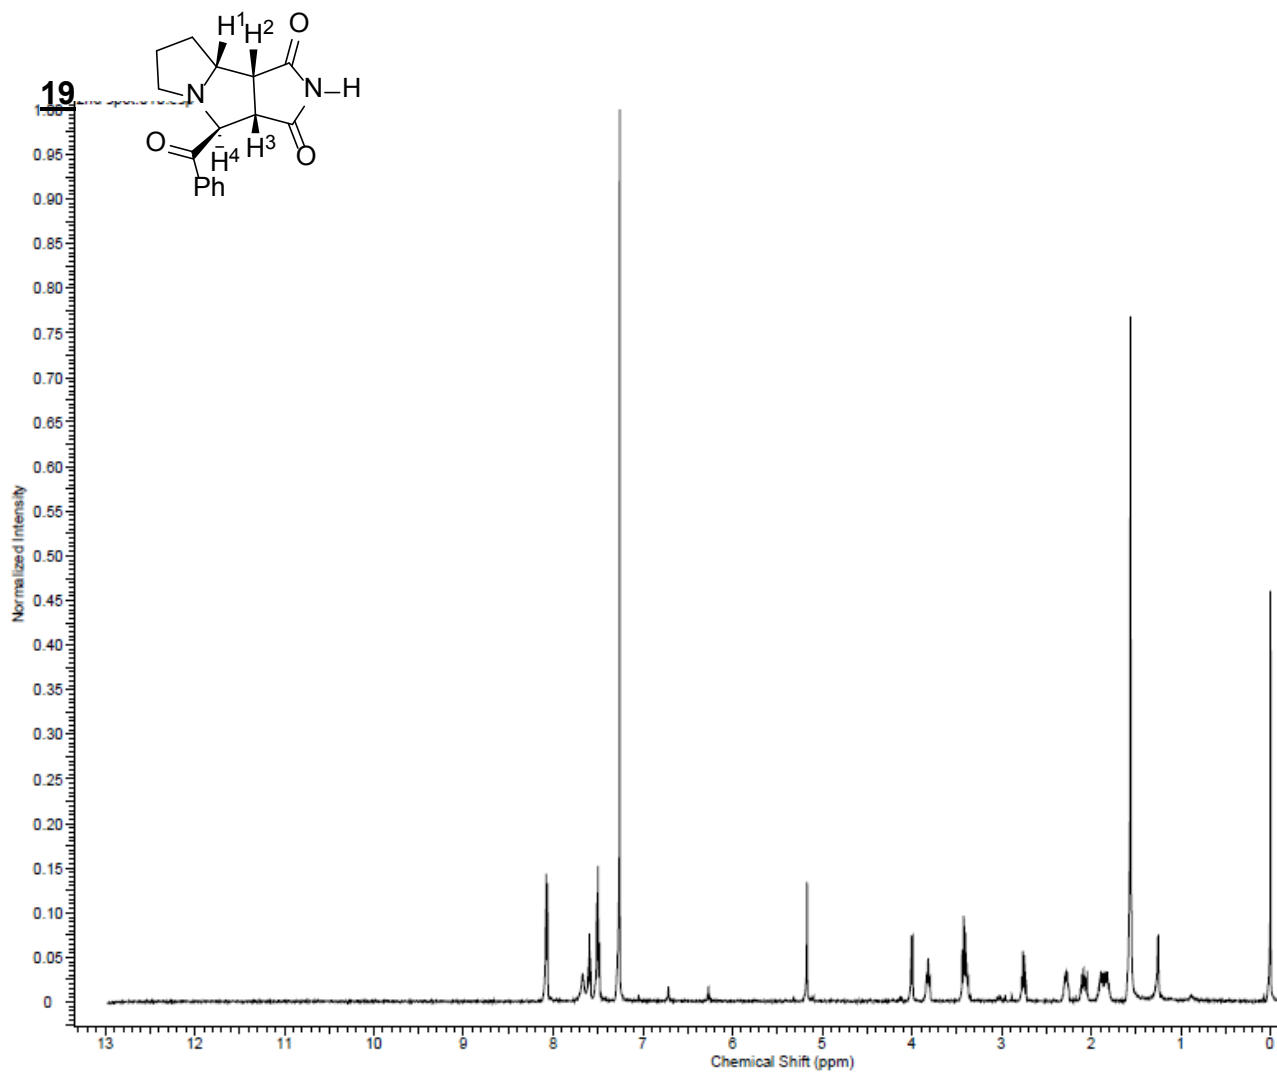



**20**

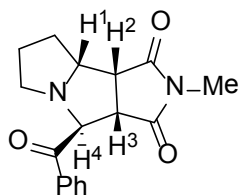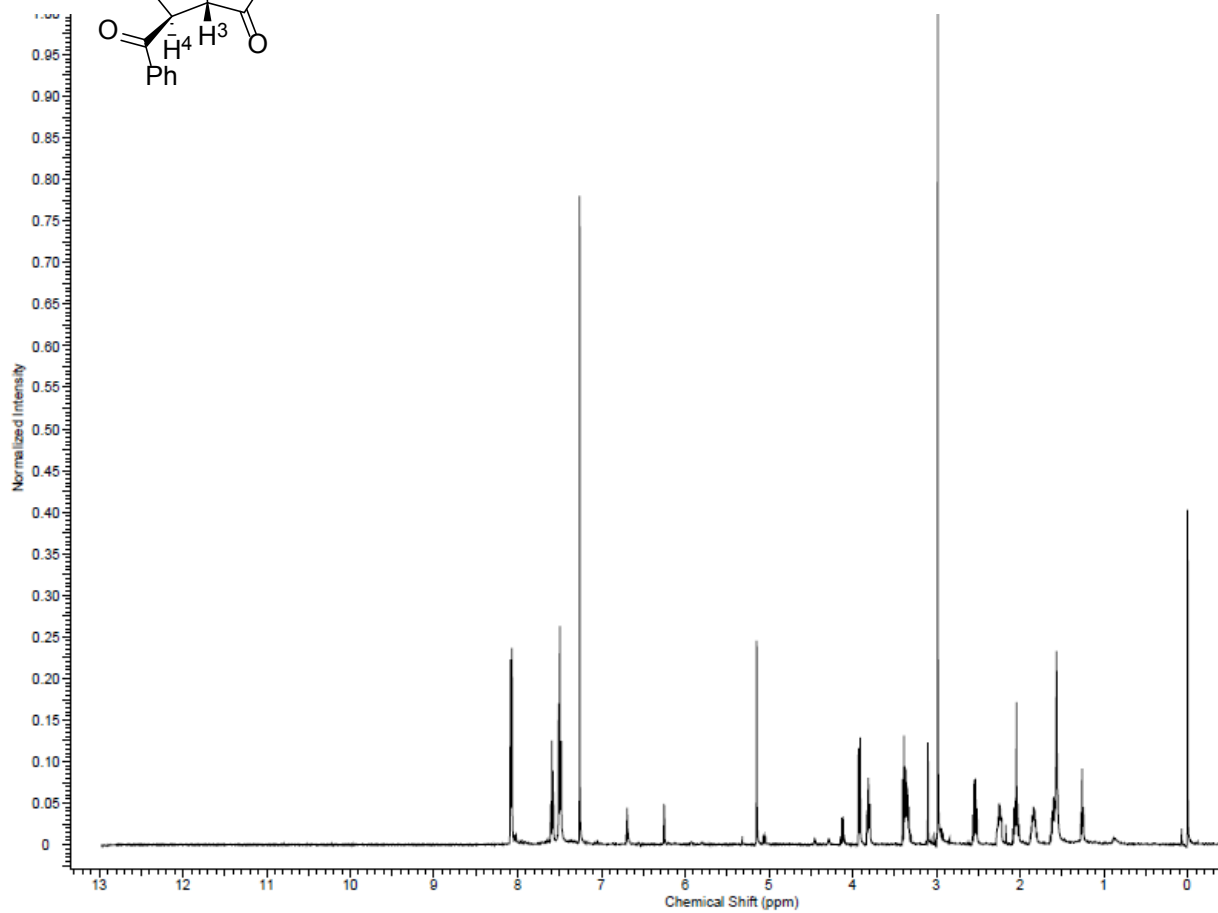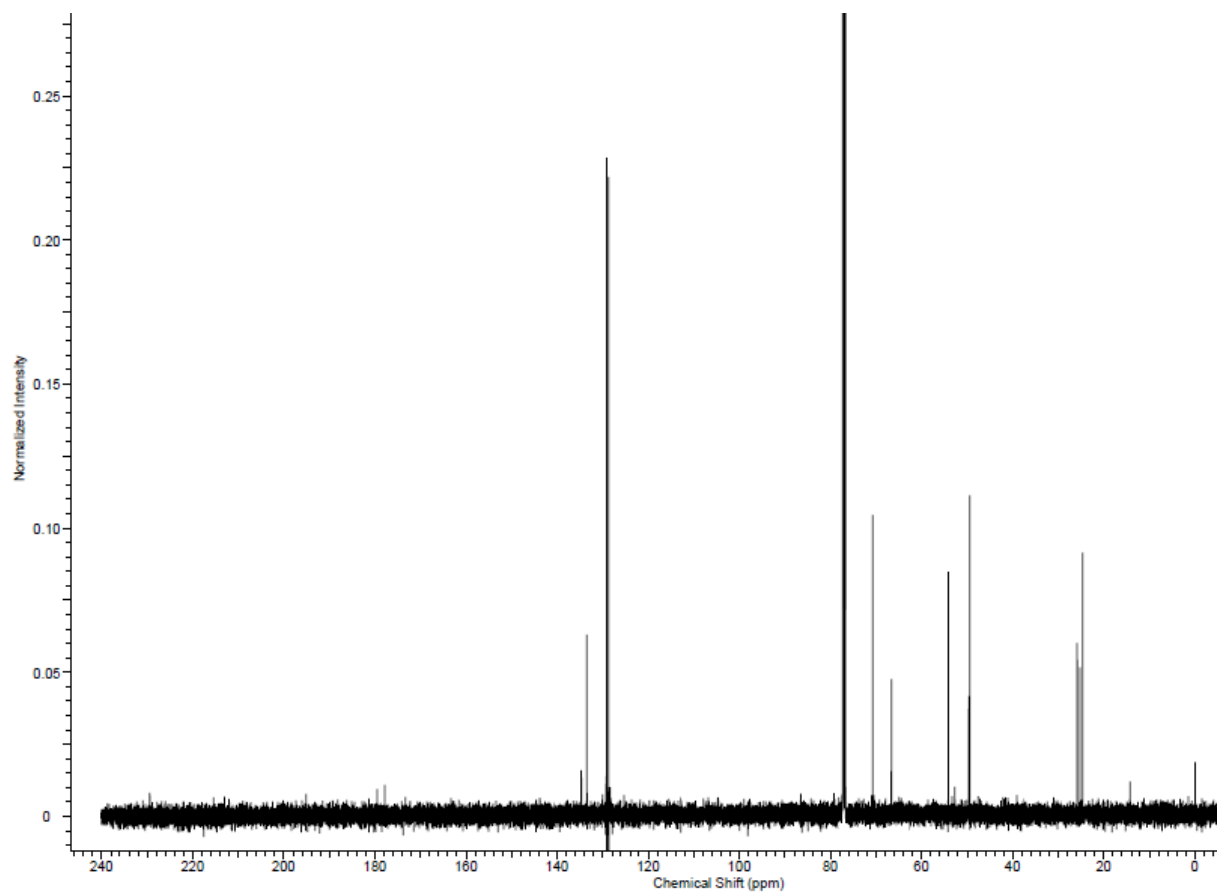

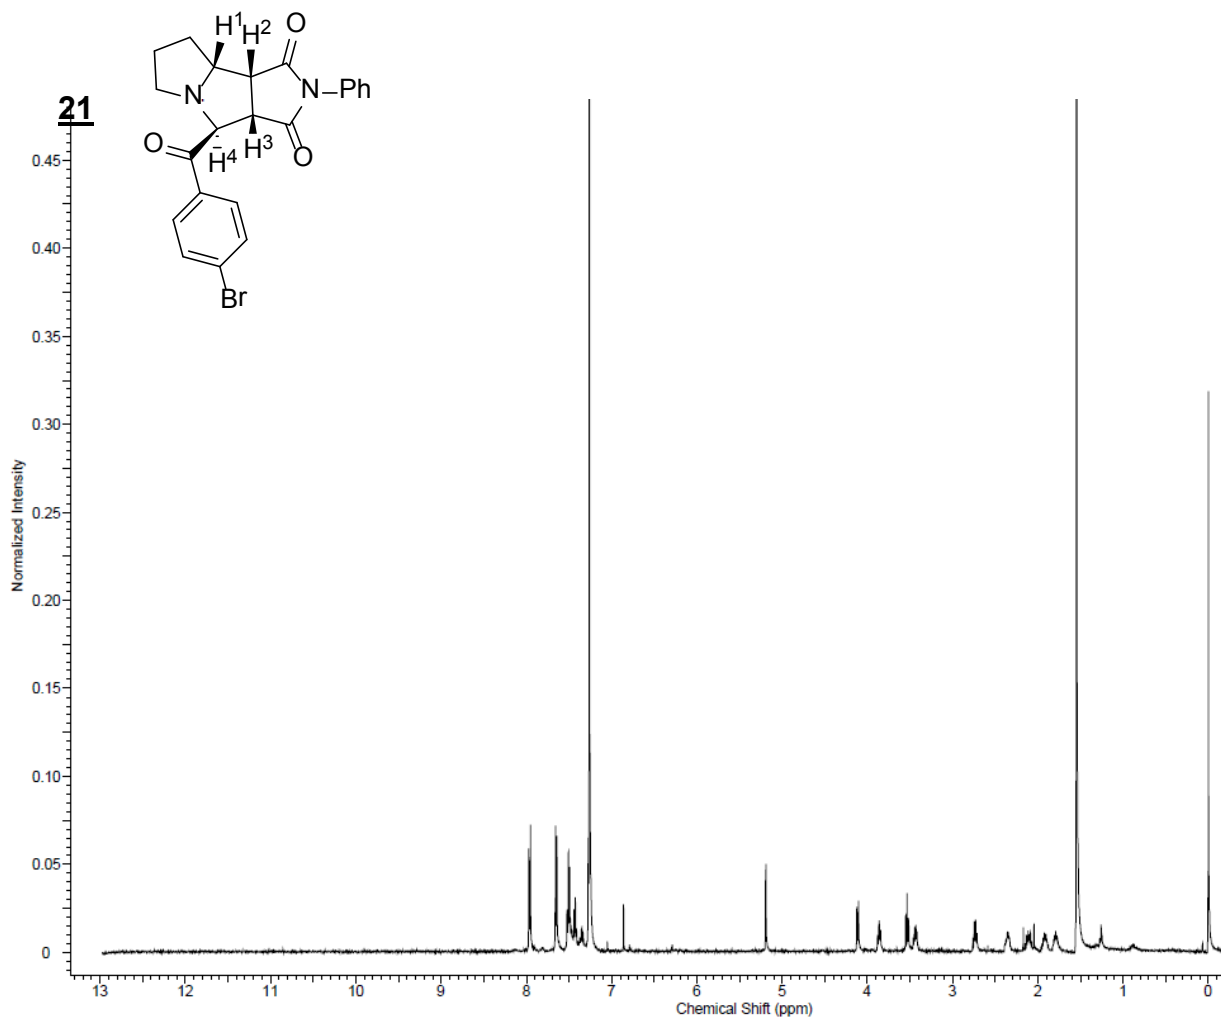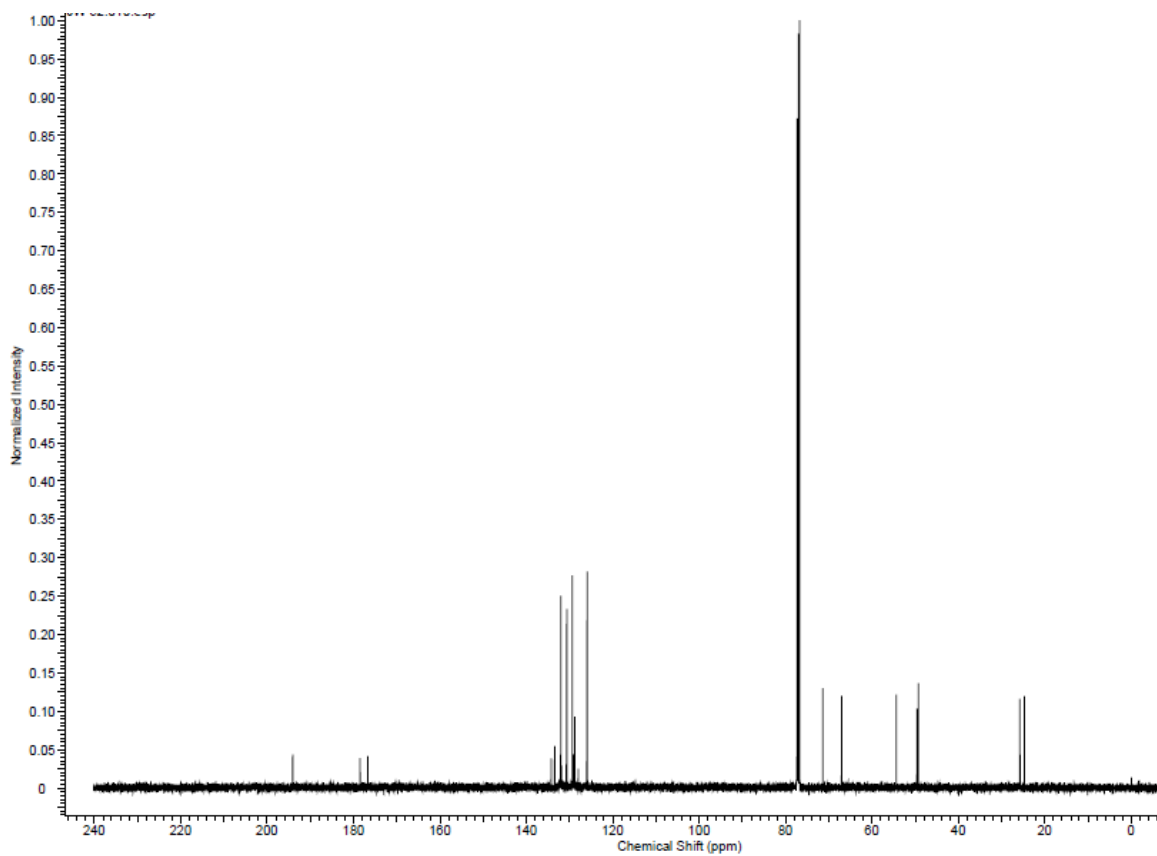

22

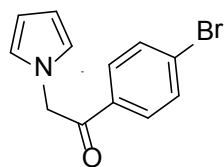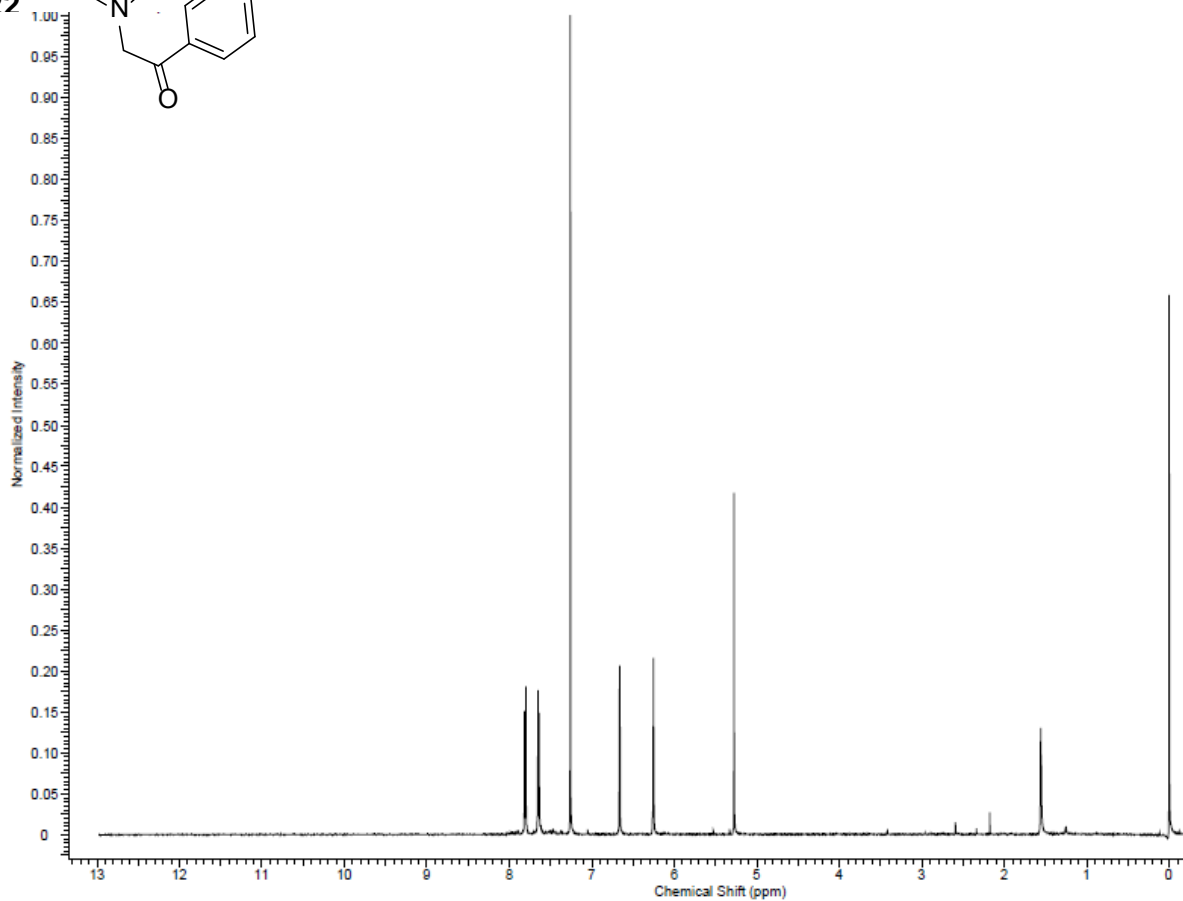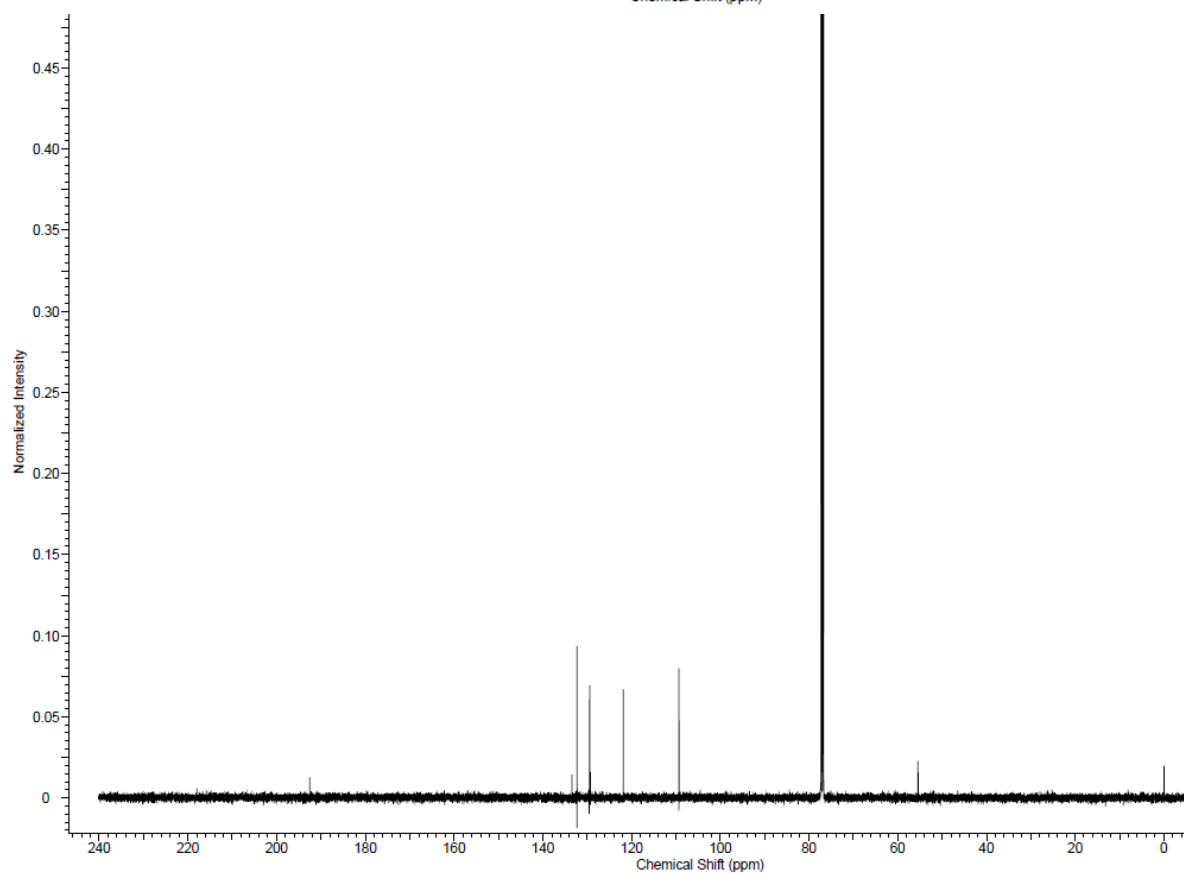

**23**

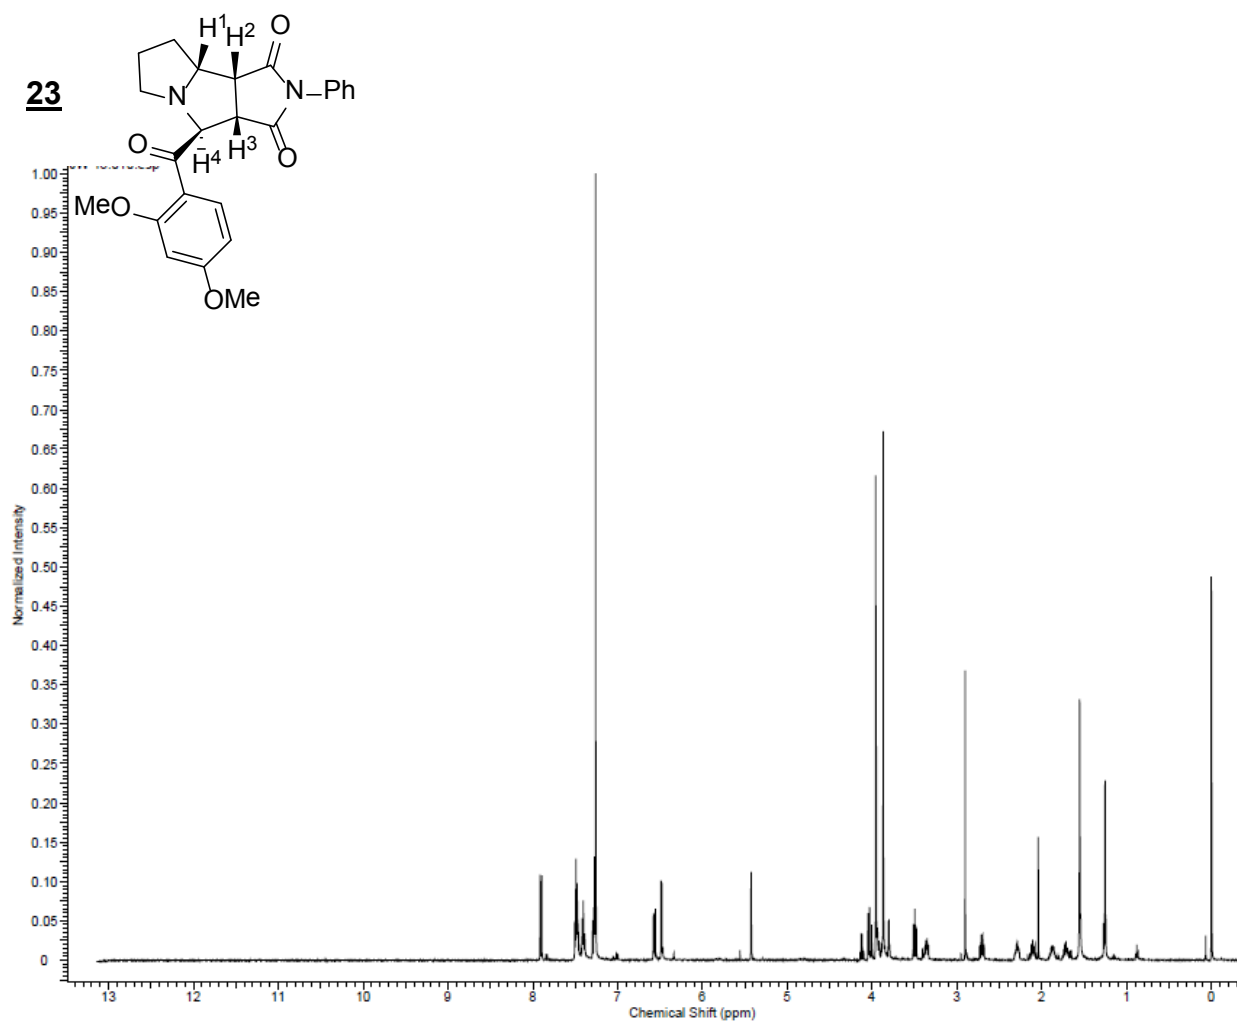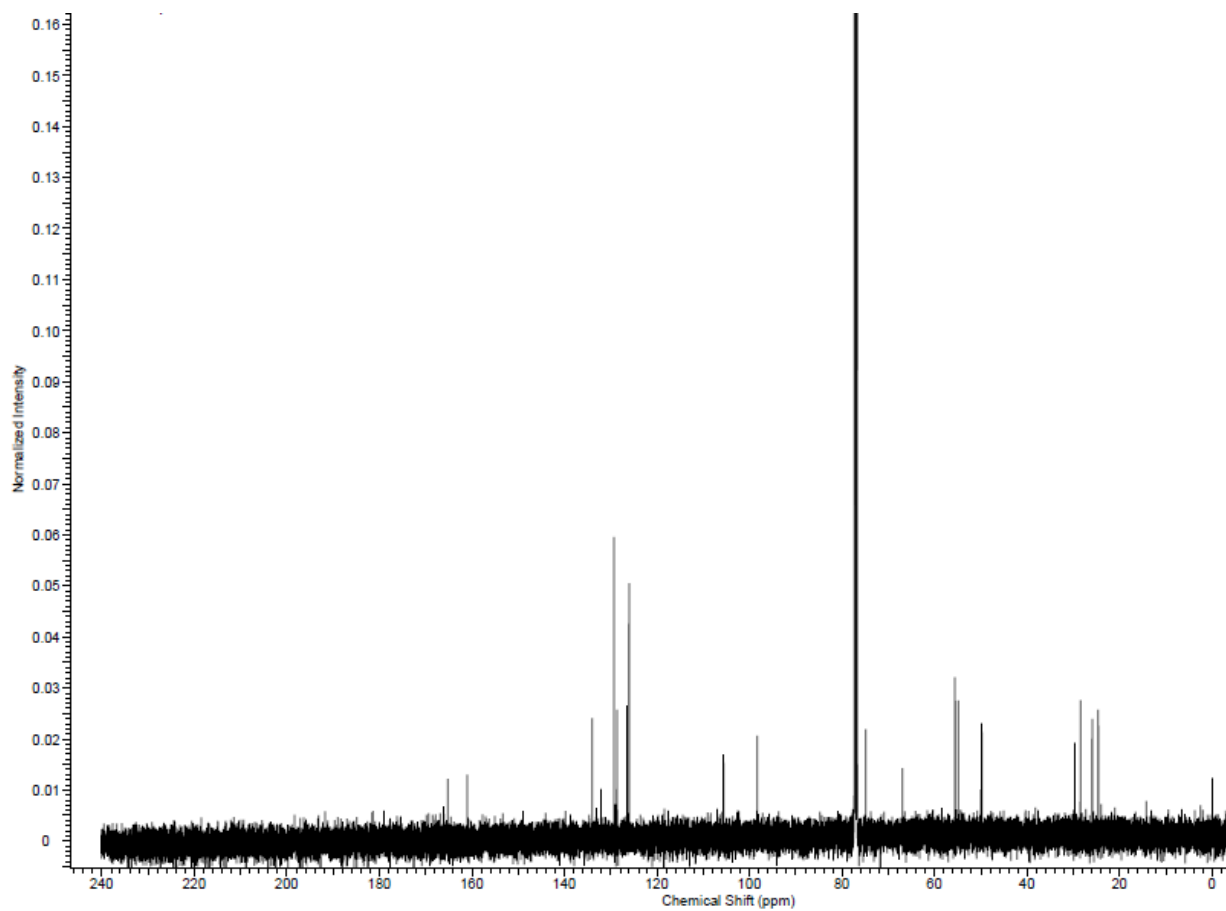

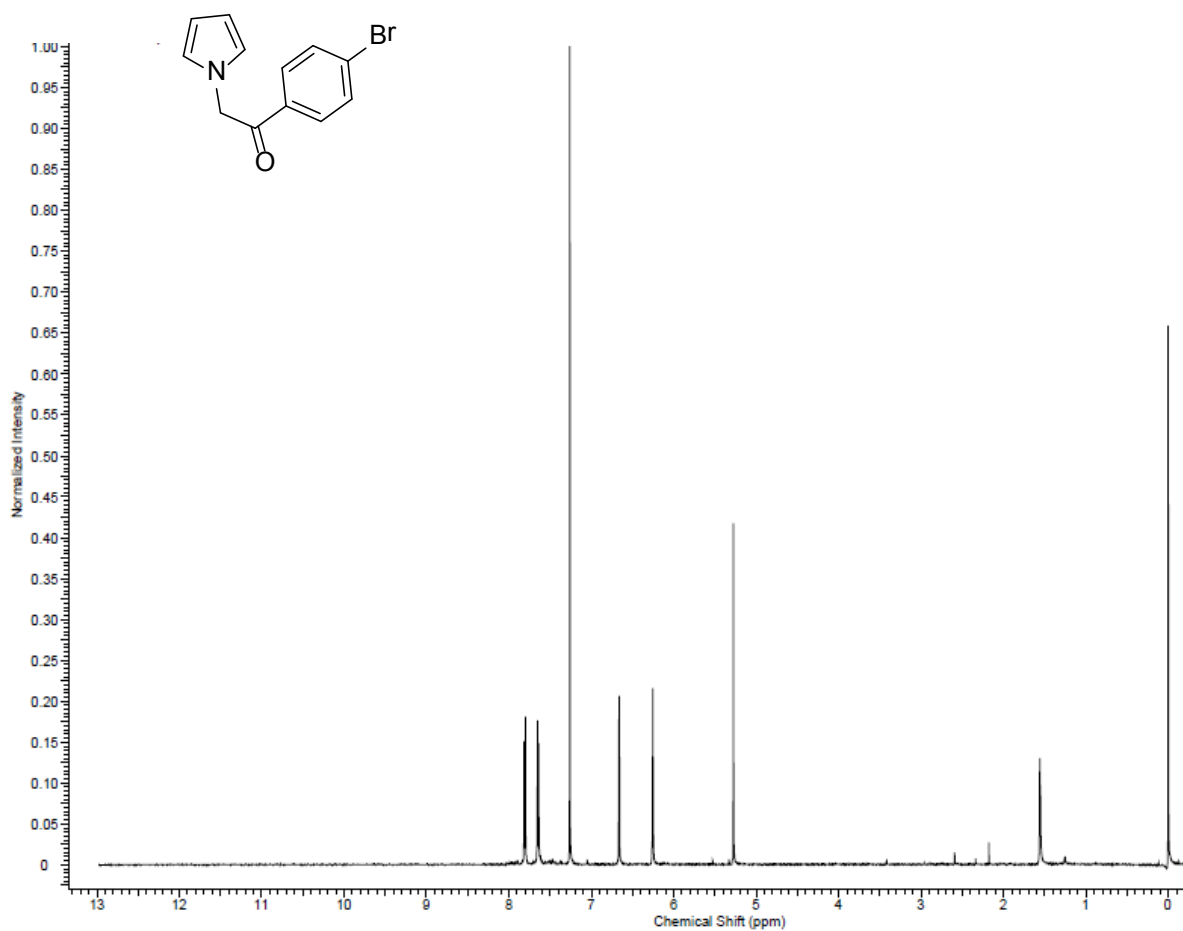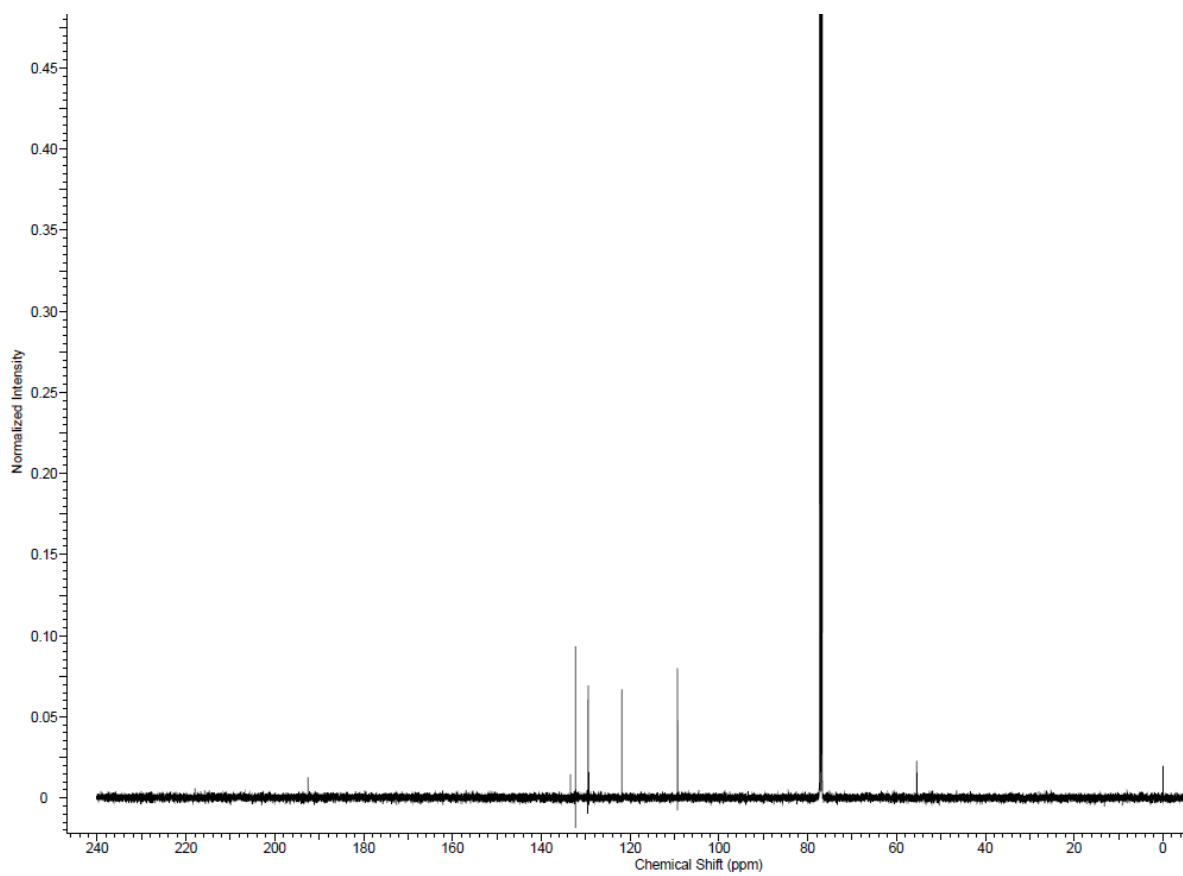

## 25pyrrole

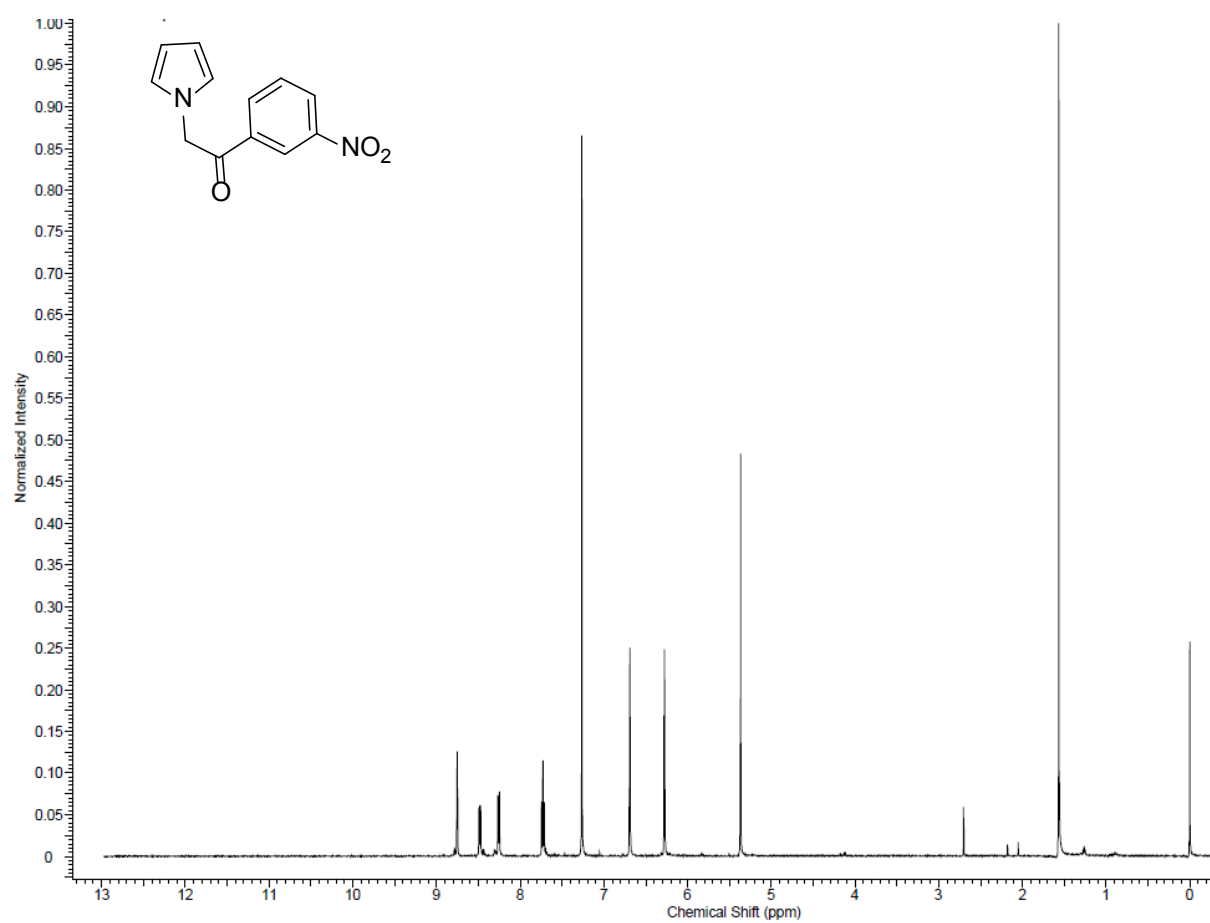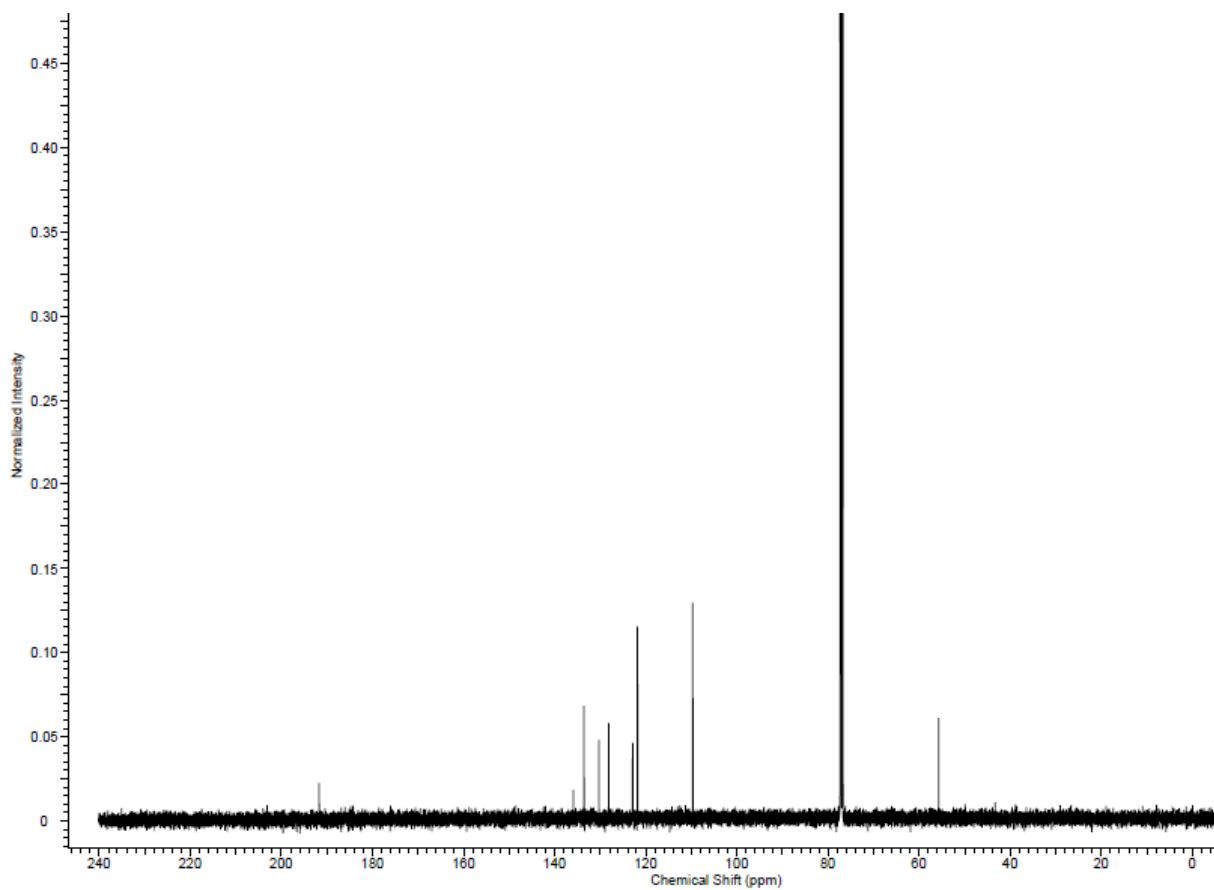

Supplement: c3ra45906c.pdf [file c3ra45906c.pdf]
